# Supplementary material
Source: PubMed Central journal article supplement (PMC7930429)
Supplement: ONCO-26-208-s001.pdf [file ONCO-26-208-s001.pdf]

Supplementary Table S1: Somatic mutations observed in this study and clinical implication

| Gene Symbol | Protein Change    | OncoKB Clinical Implication | Mutation Type         | Cohort         |
|-------------|-------------------|-----------------------------|-----------------------|----------------|
| APC         | L34F              | Unknown                     | missense_variant      | MSKCC          |
| APC         | S104Ifs*35        | Likely Oncogenic            | frameshift_variant    | MSKCC          |
| APC         | A146V             | Unknown                     | missense_variant      | MSKCC          |
| APC         | W157*             | Likely Oncogenic            | stop_gained           | COH/UCD        |
| APC         | D170Vfs*4         | Likely Oncogenic            | frameshift_variant    | MSKCC          |
| APC         | X177_splice       | Likely Oncogenic            | splice_region_variant | MSKCC          |
| APC         | X178_splice       | Likely Oncogenic            | splice_region_variant | MSKCC          |
| APC         | L180*             | Likely Oncogenic            | stop_gained           | MSKCC          |
| APC         | D183Rfs*10        | Likely Oncogenic            | frameshift_variant    | MSKCC          |
| APC         | E190*             | Likely Oncogenic            | stop_gained           | MSKCC          |
| APC         | Y191*             | Likely Oncogenic            | stop_gained           | MSKCC          |
| APC         | R194Gfs*11        | Likely Oncogenic            | frameshift_variant    | MSKCC          |
| APC         | Q195*             | Likely Oncogenic            | stop_gained           | MSKCC          |
| APC         | A199fs*53         | Likely Oncogenic            | frameshift_variant    | COH/UCD        |
| APC         | R213*             | Likely Oncogenic            | stop_gained           | COH/UCD; MSKCC |
| APC         | R213Tfs*39        | Likely Oncogenic            | frameshift_variant    | MSKCC          |
| APC         | X215_splice       | Likely Oncogenic            | splice_region_variant | MSKCC          |
| APC         | R216*             | Likely Oncogenic            | stop_gained           | COH/UCD; MSKCC |
| APC         | X216_splice       | Likely Oncogenic            | splice_region_variant | MSKCC          |
| APC         | Q222_Q223delinsH* | Unknown                     | inframe_deletion      | MSKCC          |
| APC         | Q223*             | Likely Oncogenic            | stop_gained           | COH/UCD        |
| APC         | Q223H             | Unknown                     | missense_variant      | COH/UCD        |
| APC         | K226fs*67         | Likely Oncogenic            | frameshift_variant    | COH/UCD        |
| APC         | R230fs*20         | Likely Oncogenic            | frameshift_variant    | COH/UCD        |
| APC         | R232*             | Likely Oncogenic            | stop_gained           | COH/UCD; MSKCC |
| APC         | Q233Pfs*25        | Likely Oncogenic            | frameshift_variant    | MSKCC          |
| APC         | L235*             | Likely Oncogenic            | stop_gained           | MSKCC          |
| APC         | L235Yfs*58        | Likely Oncogenic            | frameshift_variant    | MSKCC          |
| APC         | X244_splice       | Likely Oncogenic            | splice_region_variant | MSKCC          |
| APC         | S245*             | Likely Oncogenic            | stop_gained           | MSKCC          |
| APC         | Q247Efs*4         | Likely Oncogenic            | frameshift_variant    | MSKCC          |
| APC         | G253S             | Unknown                     | missense_variant      | COH/UCD        |
| APC         | S254*             | Likely Oncogenic            | stop_gained           | MSKCC          |
| APC         | Q260*             | Likely Oncogenic            | stop_gained           | COH/UCD        |
| APC         | Q260_N261delins*  | Unknown                     | inframe_deletion      | MSKCC          |
| APC         | E262*             | Likely Oncogenic            | stop_gained           | MSKCC          |
| APC         | Q264*             | Likely Oncogenic            | stop_gained           | MSKCC          |
| APC         | E268*             | Likely Oncogenic            | stop_gained           | MSKCC          |
| APC         | X278_splice       | Likely Oncogenic            | splice_region_variant | COH/UCD; MSKCC |
| APC         | G279fs*12         | Likely Oncogenic            | frameshift_variant    | COH/UCD        |
| APC         | R283*             | Likely Oncogenic            | stop_gained           | COH/UCD; MSKCC |
| APC         | T297Qfs*9         | Likely Oncogenic            | frameshift_variant    | MSKCC          |
| APC         | H298Lfs*28        | Likely Oncogenic            | frameshift_variant    | MSKCC          |
| APC         | S299Cfs*27        | Likely Oncogenic            | frameshift_variant    | MSKCC          |
| APC         | A300fs*26         | Likely Oncogenic            | frameshift_variant    | COH/UCD        |
| APC         | R302*             | Likely Oncogenic            | stop_gained           | COH/UCD; MSKCC |
| APC         | G309*             | Likely Oncogenic            | stop_gained           | COH/UCD        |
| APC         | G309Efs*27        | Likely Oncogenic            | frameshift_variant    | MSKCC          |
| APC         | X311_splice       | Likely Oncogenic            | splice_region_variant | COH/UCD        |
| APC         | L318Ffs*9         | Likely Oncogenic            | frameshift_variant    | MSKCC          |
| APC         | R332*             | Likely Oncogenic            | stop_gained           | COH/UCD; MSKCC |
| APC         | R348*             | Likely Oncogenic            | stop_gained           | COH/UCD        |
| APC         | K365N             | Unknown                     | missense_variant      | MSKCC          |
| APC         | E403fs*51         | Likely Oncogenic            | frameshift_variant    | COH/UCD        |
| APC         | E403Kfs*51        | Likely Oncogenic            | frameshift_variant    | MSKCC          |
| APC         | R405*             | Likely Oncogenic            | stop_gained           | COH/UCD; MSKCC |
| APC         | Q412*             | Likely Oncogenic            | stop_gained           | MSKCC          |
| APC         | R414Tfs*5         | Likely Oncogenic            | frameshift_variant    | MSKCC          |
| APC         | C417Wfs*37        | Likely Oncogenic            | frameshift_variant    | MSKCC          |
| APC         | W423*             | Likely Oncogenic            | stop_gained           | COH/UCD; MSKCC |
| APC         | N436fs*8          | Likely Oncogenic            | frameshift_variant    | COH/UCD        |
| APC         | N436Kfs*8         | Likely Oncogenic            | frameshift_variant    | MSKCC          |
| APC         | M438Sfs*6         | Likely Oncogenic            | frameshift_variant    | MSKCC          |
| APC         | X438_splice       | Likely Oncogenic            | splice_region_variant | COH/UCD; MSKCC |
| APC         | A440T             | Unknown                     | missense_variant      | COH/UCD        |
| APC         | V442D             | Unknown                     | missense_variant      | MSKCC          |
| APC         | E443*             | Likely Oncogenic            | stop_gained           | COH/UCD        |
| APC         | Q445*             | Likely Oncogenic            | stop_gained           | MSKCC          |
| APC         | V452fs*7          | Likely Oncogenic            | frameshift_variant    | COH/UCD        |
| APC         | V452Sfs*7         | Likely Oncogenic            | frameshift_variant    | MSKCC          |
| APC         | L456Sfs*6         | Likely Oncogenic            | frameshift_variant    | MSKCC          |
| APC         | S457fs*2          | Likely Oncogenic            | frameshift_variant    | COH/UCD        |
| APC         | S457*             | Likely Oncogenic            | stop_gained           | COH/UCD; MSKCC |
| APC         | E460*             | Likely Oncogenic            | stop_gained           | COH/UCD        |
| APC         | X470_splice       | Likely Oncogenic            | splice_region_variant | COH/UCD; MSKCC |

Supplementary Table S1

|     |             |                  |                       |                |
|-----|-------------|------------------|-----------------------|----------------|
| APC | C483fs*1    | Likely Oncogenic | frameshift_variant    | COH/UCD        |
| APC | T489Lfs*9   | Likely Oncogenic | frameshift_variant    | MSKCC          |
| APC | Y493fs*44   | Likely Oncogenic | frameshift_variant    | COH/UCD        |
| APC | R499*       | Likely Oncogenic | stop_gained           | COH/UCD; MSKCC |
| APC | V513*       | Likely Oncogenic | stop_gained           | MSKCC          |
| APC | X516_splice | Likely Oncogenic | splice_region_variant | COH/UCD        |
| APC | L533R       | Unknown          | missense_variant      | COH/UCD        |
| APC | K534fs*15   | Likely Oncogenic | frameshift_variant    | COH/UCD        |
| APC | K534*       | Likely Oncogenic | stop_gained           | COH/UCD; MSKCC |
| APC | L540fs*20   | Likely Oncogenic | frameshift_variant    | COH/UCD        |
| APC | Q541*       | Likely Oncogenic | stop_gained           | MSKCC          |
| APC | Q541Tfs*19  | Likely Oncogenic | frameshift_variant    | MSKCC          |
| APC | Q542fs*19   | Likely Oncogenic | frameshift_variant    | COH/UCD        |
| APC | W553*       | Likely Oncogenic | stop_gained           | MSKCC          |
| APC | W553Gfs*5   | Likely Oncogenic | frameshift_variant    | MSKCC          |
| APC | R554*       | Likely Oncogenic | stop_gained           | COH/UCD; MSKCC |
| APC | R554Qfs*4   | Likely Oncogenic | frameshift_variant    | MSKCC          |
| APC | A555fs*2    | Likely Oncogenic | frameshift_variant    | COH/UCD        |
| APC | R564*       | Likely Oncogenic | stop_gained           | COH/UCD; MSKCC |
| APC | V569Efs*11  | Likely Oncogenic | frameshift_variant    | MSKCC          |
| APC | K570fs*11   | Likely Oncogenic | frameshift_variant    | COH/UCD        |
| APC | E574*       | Likely Oncogenic | stop_gained           | MSKCC          |
| APC | E578*       | Likely Oncogenic | stop_gained           | MSKCC          |
| APC | X582_splice | Likely Oncogenic | splice_region_variant | MSKCC          |
| APC | S583*       | Likely Oncogenic | stop_gained           | MSKCC          |
| APC | L592*       | Likely Oncogenic | stop_gained           | MSKCC          |
| APC | S596*       | Likely Oncogenic | stop_gained           | MSKCC          |
| APC | C599*       | Likely Oncogenic | stop_gained           | COH/UCD        |
| APC | F615fs*19   | Likely Oncogenic | frameshift_variant    | MSKCC          |
| APC | L616Ffs*17  | Likely Oncogenic | frameshift_variant    | MSKCC          |
| APC | T621fs*9    | Likely Oncogenic | frameshift_variant    | MSKCC          |
| APC | Y622fs*7    | Likely Oncogenic | frameshift_variant    | COH/UCD        |
| APC | Y622*       | Likely Oncogenic | stop_gained           | MSKCC          |
| APC | Q625*       | Likely Oncogenic | stop_gained           | MSKCC          |
| APC | N627Lfs*2   | Likely Oncogenic | frameshift_variant    | MSKCC          |
| APC | N627Tfs*3   | Likely Oncogenic | frameshift_variant    | MSKCC          |
| APC | L629fs*4    | Likely Oncogenic | frameshift_variant    | COH/UCD        |
| APC | L629*       | Likely Oncogenic | stop_gained           | MSKCC          |
| APC | L629Sfs*4   | Likely Oncogenic | frameshift_variant    | MSKCC          |
| APC | G637R       | Unknown          | missense_variant      | MSKCC          |
| APC | I638Yfs*8   | Likely Oncogenic | frameshift_variant    | MSKCC          |
| APC | R640W       | Likely Oncogenic | missense_variant      | COH/UCD; MSKCC |
| APC | R653K       | Unknown          | missense_variant      | COH/UCD; MSKCC |
| APC | X653_splice | Likely Oncogenic | splice_region_variant | COH/UCD; MSKCC |
| APC | R657Kfs*18  | Likely Oncogenic | frameshift_variant    | MSKCC          |
| APC | L662Tfs*12  | Likely Oncogenic | frameshift_variant    | MSKCC          |
| APC | Q663*       | Likely Oncogenic | stop_gained           | MSKCC          |
| APC | K670*       | Likely Oncogenic | stop_gained           | MSKCC          |
| APC | W685*       | Likely Oncogenic | stop_gained           | MSKCC          |
| APC | A689fs*10   | Likely Oncogenic | frameshift_variant    | COH/UCD        |
| APC | D694N       | Unknown          | missense_variant      | MSKCC          |
| APC | Q695*       | Likely Oncogenic | stop_gained           | COH/UCD        |
| APC | E696*       | Likely Oncogenic | stop_gained           | MSKCC          |
| APC | E696V       | Unknown          | missense_variant      | MSKCC          |
| APC | L698*       | Likely Oncogenic | stop_gained           | COH/UCD        |
| APC | S713*       | Likely Oncogenic | stop_gained           | MSKCC          |
| APC | G721Efs*6   | Likely Oncogenic | frameshift_variant    | MSKCC          |
| APC | N728Kfs*6   | Likely Oncogenic | frameshift_variant    | MSKCC          |
| APC | A735P       | Unknown          | missense_variant      | MSKCC          |
| APC | Y737*       | Likely Oncogenic | stop_gained           | COH/UCD; MSKCC |
| APC | N741fs*20   | Likely Oncogenic | frameshift_variant    | MSKCC          |
| APC | S747*       | Likely Oncogenic | stop_gained           | MSKCC          |
| APC | L749Ffs*12  | Likely Oncogenic | frameshift_variant    | MSKCC          |
| APC | K758Ifs*17  | Likely Oncogenic | frameshift_variant    | MSKCC          |
| APC | A759fs*16   | Likely Oncogenic | frameshift_variant    | COH/UCD        |
| APC | E761Kfs*4   | Likely Oncogenic | frameshift_variant    | MSKCC          |
| APC | A762Gfs*13  | Likely Oncogenic | frameshift_variant    | MSKCC          |
| APC | E763*       | Likely Oncogenic | stop_gained           | MSKCC          |
| APC | L764*       | Likely Oncogenic | stop_gained           | MSKCC          |
| APC | Q767*       | Likely Oncogenic | stop_gained           | COH/UCD; MSKCC |
| APC | S770fs*5    | Likely Oncogenic | frameshift_variant    | COH/UCD        |
| APC | S770*       | Likely Oncogenic | stop_gained           | COH/UCD        |
| APC | S770Qfs*7   | Likely Oncogenic | frameshift_variant    | MSKCC          |
| APC | T772Lfs*5   | Likely Oncogenic | frameshift_variant    | MSKCC          |
| APC | F773Lfs*4   | Likely Oncogenic | frameshift_variant    | MSKCC          |
| APC | N775Yfs*12  | Likely Oncogenic | frameshift_variant    | MSKCC          |
| APC | A783Efs*11  | Likely Oncogenic | frameshift_variant    | MSKCC          |
| APC | Q789*       | Likely Oncogenic | stop_gained           | COH/UCD; MSKCC |
| APC | R790Tfs*8   | Likely Oncogenic | frameshift_variant    | MSKCC          |

Supplementary Table S1

|     |             |                  |                    |                |
|-----|-------------|------------------|--------------------|----------------|
| APC | H791Qfs*7   | Likely Oncogenic | frameshift_variant | MSKCC          |
| APC | K792*       | Likely Oncogenic | stop_gained        | COH/UCD        |
| APC | S794Kfs*5   | Likely Oncogenic | frameshift_variant | MSKCC          |
| APC | Y796fs*2    | Likely Oncogenic | frameshift_variant | COH/UCD        |
| APC | Y796Wfs*2   | Likely Oncogenic | frameshift_variant | MSKCC          |
| APC | D802*       | Likely Oncogenic | stop_gained        | MSKCC          |
| APC | R805*       | Likely Oncogenic | stop_gained        | COH/UCD; MSKCC |
| APC | F814fs*6    | Likely Oncogenic | frameshift_variant | COH/UCD        |
| APC | S823Hfs*4   | Likely Oncogenic | frameshift_variant | MSKCC          |
| APC | P824Hfs*3   | Likely Oncogenic | frameshift_variant | MSKCC          |
| APC | P824Tfs*20  | Likely Oncogenic | frameshift_variant | MSKCC          |
| APC | Y825Ffs*13  | Likely Oncogenic | frameshift_variant | MSKCC          |
| APC | S833Afs*9   | Likely Oncogenic | frameshift_variant | MSKCC          |
| APC | R838*       | Likely Oncogenic | stop_gained        | MSKCC          |
| APC | E847*       | Likely Oncogenic | stop_gained        | COH/UCD; MSKCC |
| APC | D849fs*12   | Likely Oncogenic | frameshift_variant | COH/UCD        |
| APC | D849fs*2    | Likely Oncogenic | frameshift_variant | COH/UCD        |
| APC | D849fs*62   | Likely Oncogenic | frameshift_variant | COH/UCD        |
| APC | D849Rfs*2   | Likely Oncogenic | frameshift_variant | MSKCC          |
| APC | E853Gfs*9   | Likely Oncogenic | frameshift_variant | MSKCC          |
| APC | R854Efs*7   | Likely Oncogenic | frameshift_variant | MSKCC          |
| APC | R856fs*6    | Likely Oncogenic | frameshift_variant | COH/UCD        |
| APC | T867Nfs*46  | Likely Oncogenic | frameshift_variant | MSKCC          |
| APC | E868*       | Likely Oncogenic | stop_gained        | MSKCC          |
| APC | G871Efs*45  | Likely Oncogenic | frameshift_variant | MSKCC          |
| APC | R876*       | Likely Oncogenic | stop_gained        | COH/UCD; MSKCC |
| APC | R876Afs*36  | Likely Oncogenic | frameshift_variant | MSKCC          |
| APC | Q879*       | Likely Oncogenic | stop_gained        | MSKCC          |
| APC | Q886*       | Likely Oncogenic | stop_gained        | MSKCC          |
| APC | V890Sfs*26  | Likely Oncogenic | frameshift_variant | MSKCC          |
| APC | E892*       | Likely Oncogenic | stop_gained        | MSKCC          |
| APC | E893*       | Likely Oncogenic | stop_gained        | MSKCC          |
| APC | S895*       | Likely Oncogenic | stop_gained        | COH/UCD; MSKCC |
| APC | E902*       | Likely Oncogenic | stop_gained        | MSKCC          |
| APC | D903Efs*13  | Likely Oncogenic | frameshift_variant | MSKCC          |
| APC | S906Ffs*6   | Likely Oncogenic | frameshift_variant | MSKCC          |
| APC | V915fs*5    | Likely Oncogenic | frameshift_variant | COH/UCD        |
| APC | T916Kfs*39  | Likely Oncogenic | frameshift_variant | MSKCC          |
| APC | D917fs*5    | Likely Oncogenic | frameshift_variant | COH/UCD        |
| APC | E918Rfs*37  | Likely Oncogenic | frameshift_variant | MSKCC          |
| APC | R919*       | Likely Oncogenic | stop_gained        | COH/UCD        |
| APC | R919Kfs*4   | Likely Oncogenic | frameshift_variant | MSKCC          |
| APC | R923*       | Likely Oncogenic | stop_gained        | MSKCC          |
| APC | S932*       | Likely Oncogenic | stop_gained        | MSKCC          |
| APC | Y935fs*1    | Likely Oncogenic | frameshift_variant | COH/UCD        |
| APC | Y935fs*5    | Likely Oncogenic | frameshift_variant | COH/UCD        |
| APC | Y935*       | Likely Oncogenic | stop_gained        | COH/UCD; MSKCC |
| APC | Y935Ifs*19  | Likely Oncogenic | frameshift_variant | MSKCC          |
| APC | N936Kfs*14  | Likely Oncogenic | frameshift_variant | MSKCC          |
| APC | N936S       | Unknown          | missense_variant   | MSKCC          |
| APC | F937Sfs*18  | Likely Oncogenic | frameshift_variant | MSKCC          |
| APC | E941*       | Likely Oncogenic | stop_gained        | COH/UCD; MSKCC |
| APC | N942Ifs*13  | Likely Oncogenic | frameshift_variant | MSKCC          |
| APC | S943*       | Likely Oncogenic | stop_gained        | COH/UCD; MSKCC |
| APC | M949Yfs*15  | Likely Oncogenic | frameshift_variant | MSKCC          |
| APC | Y951*       | Likely Oncogenic | stop_gained        | MSKCC          |
| APC | L954*       | Likely Oncogenic | stop_gained        | MSKCC          |
| APC | L954S       | Unknown          | missense_variant   | COH/UCD        |
| APC | E955*       | Likely Oncogenic | stop_gained        | COH/UCD        |
| APC | N961Mfs*4   | Likely Oncogenic | frameshift_variant | MSKCC          |
| APC | R976fs*9    | Likely Oncogenic | frameshift_variant | COH/UCD        |
| APC | R976*       | Likely Oncogenic | stop_gained        | MSKCC          |
| APC | K980*       | Likely Oncogenic | stop_gained        | MSKCC          |
| APC | E984*       | Likely Oncogenic | stop_gained        | COH/UCD; MSKCC |
| APC | Y986*       | Likely Oncogenic | stop_gained        | COH/UCD        |
| APC | K993*       | Likely Oncogenic | stop_gained        | MSKCC          |
| APC | D1003N      | Unknown          | missense_variant   | COH/UCD        |
| APC | L1004Nfs*3  | Likely Oncogenic | frameshift_variant | MSKCC          |
| APC | K1007fs*2   | Likely Oncogenic | frameshift_variant | COH/UCD        |
| APC | I1008Nfs*3  | Likely Oncogenic | frameshift_variant | MSKCC          |
| APC | I1008Yfs*14 | Likely Oncogenic | frameshift_variant | MSKCC          |
| APC | N1012fs*5   | Likely Oncogenic | frameshift_variant | COH/UCD        |
| APC | E1020*      | Likely Oncogenic | stop_gained        | MSKCC          |
| APC | L1021Rfs*7  | Likely Oncogenic | frameshift_variant | MSKCC          |
| APC | D1022H      | Unknown          | missense_variant   | MSKCC          |
| APC | T1023Nfs*6  | Likely Oncogenic | frameshift_variant | MSKCC          |
| APC | N1026Kfs*3  | Likely Oncogenic | frameshift_variant | MSKCC          |
| APC | S1028Ifs*9  | Likely Oncogenic | frameshift_variant | MSKCC          |
| APC | K1030*      | Likely Oncogenic | stop_gained        | MSKCC          |

Supplementary Table S1

|     |             |                  |                    |                |
|-----|-------------|------------------|--------------------|----------------|
| APC | K1030Nfs*7  | Likely Oncogenic | frameshift_variant | MSKCC          |
| APC | Y1031*      | Likely Oncogenic | stop_gained        | COH/UCD        |
| APC | S1032*      | Likely Oncogenic | stop_gained        | MSKCC          |
| APC | Q1035*      | Likely Oncogenic | stop_gained        | MSKCC          |
| APC | N1037Tfs*19 | Likely Oncogenic | frameshift_variant | MSKCC          |
| APC | G1039*      | Likely Oncogenic | stop_gained        | MSKCC          |
| APC | Q1041*      | Likely Oncogenic | stop_gained        | MSKCC          |
| APC | P1043Ffs*4  | Likely Oncogenic | frameshift_variant | MSKCC          |
| APC | S1044*      | Likely Oncogenic | stop_gained        | COH/UCD        |
| APC | E1047*      | Likely Oncogenic | stop_gained        | MSKCC          |
| APC | W1049*      | Likely Oncogenic | stop_gained        | MSKCC          |
| APC | I1056Kfs*5  | Likely Oncogenic | frameshift_variant | MSKCC          |
| APC | I1056Mfs*5  | Likely Oncogenic | frameshift_variant | MSKCC          |
| APC | D1058G      | Unknown          | missense_variant   | COH/UCD        |
| APC | E1059*      | Likely Oncogenic | stop_gained        | MSKCC          |
| APC | I1060Tfs*3  | Likely Oncogenic | frameshift_variant | MSKCC          |
| APC | Q1062fs*1   | Likely Oncogenic | frameshift_variant | COH/UCD        |
| APC | Q1062*      | Likely Oncogenic | stop_gained        | MSKCC          |
| APC | Q1065*      | Likely Oncogenic | stop_gained        | MSKCC          |
| APC | Q1067*      | Likely Oncogenic | stop_gained        | MSKCC          |
| APC | S1068Gfs*57 | Likely Oncogenic | frameshift_variant | MSKCC          |
| APC | Q1071*      | Likely Oncogenic | stop_gained        | MSKCC          |
| APC | S1072Rfs*11 | Likely Oncogenic | frameshift_variant | MSKCC          |
| APC | Y1075*      | Likely Oncogenic | stop_gained        | COH/UCD        |
| APC | P1076Lfs*3  | Likely Oncogenic | frameshift_variant | MSKCC          |
| APC | V1077Hfs*2  | Likely Oncogenic | frameshift_variant | MSKCC          |
| APC | E1080*      | Likely Oncogenic | stop_gained        | MSKCC          |
| APC | K1088*      | Likely Oncogenic | stop_gained        | COH/UCD        |
| APC | Q1090*      | Likely Oncogenic | stop_gained        | COH/UCD        |
| APC | Q1095*      | Likely Oncogenic | stop_gained        | MSKCC          |
| APC | Q1096*      | Likely Oncogenic | stop_gained        | MSKCC          |
| APC | E1097*      | Likely Oncogenic | stop_gained        | MSKCC          |
| APC | V1099Ffs*19 | Likely Oncogenic | frameshift_variant | MSKCC          |
| APC | S1100Ffs*26 | Likely Oncogenic | frameshift_variant | MSKCC          |
| APC | E1111*      | Likely Oncogenic | stop_gained        | COH/UCD        |
| APC | E1111Gfs*15 | Likely Oncogenic | frameshift_variant | MSKCC          |
| APC | R1114*      | Likely Oncogenic | stop_gained        | COH/UCD; MSKCC |
| APC | R1114Efs*12 | Likely Oncogenic | frameshift_variant | MSKCC          |
| APC | S1117Lfs*9  | Likely Oncogenic | frameshift_variant | MSKCC          |
| APC | Q1123fs*12  | Likely Oncogenic | frameshift_variant | COH/UCD        |
| APC | V1125A      | Unknown          | missense_variant   | COH/UCD        |
| APC | Q1127*      | Likely Oncogenic | stop_gained        | MSKCC          |
| APC | D1134Efs*3  | Likely Oncogenic | frameshift_variant | MSKCC          |
| APC | Y1135*      | Likely Oncogenic | stop_gained        | MSKCC          |
| APC | Y1143*      | Likely Oncogenic | stop_gained        | MSKCC          |
| APC | Y1147fs*1   | Likely Oncogenic | frameshift_variant | COH/UCD        |
| APC | E1150*      | Likely Oncogenic | stop_gained        | COH/UCD        |
| APC | E1151*      | Likely Oncogenic | stop_gained        | MSKCC          |
| APC | E1156fs*8   | Likely Oncogenic | frameshift_variant | COH/UCD        |
| APC | E1156*      | Likely Oncogenic | stop_gained        | COH/UCD; MSKCC |
| APC | E1157del    | Unknown          | inframe_deletion   | COH/UCD        |
| APC | R1158*      | Likely Oncogenic | stop_gained        | MSKCC          |
| APC | Y1162fs*3   | Likely Oncogenic | frameshift_variant | COH/UCD        |
| APC | S1163fs*2   | Likely Oncogenic | frameshift_variant | COH/UCD        |
| APC | K1165*      | Likely Oncogenic | stop_gained        | COH/UCD; MSKCC |
| APC | Y1166*      | Likely Oncogenic | stop_gained        | MSKCC          |
| APC | Y1166Ifs*2  | Likely Oncogenic | frameshift_variant | MSKCC          |
| APC | K1170*      | Likely Oncogenic | stop_gained        | COH/UCD        |
| APC | R1171C      | Unknown          | missense_variant   | COH/UCD        |
| APC | V1173Lfs*6  | Likely Oncogenic | frameshift_variant | MSKCC          |
| APC | Q1175*      | Likely Oncogenic | stop_gained        | MSKCC          |
| APC | L1181fs*1   | Likely Oncogenic | frameshift_variant | COH/UCD        |
| APC | K1182*      | Likely Oncogenic | stop_gained        | MSKCC          |
| APC | K1182Nfs*83 | Likely Oncogenic | frameshift_variant | MSKCC          |
| APC | Y1183*      | Likely Oncogenic | stop_gained        | MSKCC          |
| APC | T1185Qfs*80 | Likely Oncogenic | frameshift_variant | MSKCC          |
| APC | K1192*      | Likely Oncogenic | stop_gained        | MSKCC          |
| APC | K1192Tfs*15 | Likely Oncogenic | frameshift_variant | MSKCC          |
| APC | Q1193*      | Likely Oncogenic | stop_gained        | MSKCC          |
| APC | S1194*      | Likely Oncogenic | stop_gained        | COH/UCD        |
| APC | S1198*      | Likely Oncogenic | stop_gained        | MSKCC          |
| APC | Q1204*      | Likely Oncogenic | stop_gained        | MSKCC          |
| APC | S1206fs*59  | Likely Oncogenic | frameshift_variant | COH/UCD        |
| APC | S1206Rfs*59 | Likely Oncogenic | frameshift_variant | MSKCC          |
| APC | T1208Nfs*9  | Likely Oncogenic | frameshift_variant | MSKCC          |
| APC | T1208Pfs*57 | Likely Oncogenic | frameshift_variant | MSKCC          |
| APC | S1213*      | Likely Oncogenic | stop_gained        | MSKCC          |
| APC | H1232Pfs*8  | Likely Oncogenic | frameshift_variant | MSKCC          |
| APC | Q1237*      | Likely Oncogenic | stop_gained        | MSKCC          |

Supplementary Table S1

|     |             |                  |                    |                |
|-----|-------------|------------------|--------------------|----------------|
| APC | Q1237Efs*2  | Likely Oncogenic | frameshift_variant | MSKCC          |
| APC | R1239*      | Likely Oncogenic | stop_gained        | MSKCC          |
| APC | Q1244*      | Likely Oncogenic | stop_gained        | MSKCC          |
| APC | K1245*      | Likely Oncogenic | stop_gained        | MSKCC          |
| APC | C1249Wfs*7  | Likely Oncogenic | frameshift_variant | MSKCC          |
| APC | K1250Sfs*5  | Likely Oncogenic | frameshift_variant | MSKCC          |
| APC | Q1256fs*9   | Likely Oncogenic | frameshift_variant | COH/UCD        |
| APC | E1257*      | Likely Oncogenic | stop_gained        | COH/UCD; MSKCC |
| APC | Q1260fs*15  | Likely Oncogenic | frameshift_variant | COH/UCD        |
| APC | Q1260*      | Likely Oncogenic | stop_gained        | COH/UCD        |
| APC | Q1260Dfs*15 | Likely Oncogenic | frameshift_variant | MSKCC          |
| APC | I1269Mfs*6  | Likely Oncogenic | frameshift_variant | MSKCC          |
| APC | C1270*      | Likely Oncogenic | stop_gained        | MSKCC          |
| APC | S1272Ffs*4  | Likely Oncogenic | frameshift_variant | MSKCC          |
| APC | R1273fs*13  | Likely Oncogenic | frameshift_variant | COH/UCD        |
| APC | C1274Lfs*5  | Likely Oncogenic | frameshift_variant | MSKCC          |
| APC | S1276*      | Likely Oncogenic | stop_gained        | MSKCC          |
| APC | S1276Tfs*6  | Likely Oncogenic | frameshift_variant | MSKCC          |
| APC | S1282*      | Likely Oncogenic | stop_gained        | COH/UCD        |
| APC | E1284D      | Unknown          | missense_variant   | MSKCC          |
| APC | E1286*      | Likely Oncogenic | stop_gained        | COH/UCD; MSKCC |
| APC | E1286Kfs*2  | Likely Oncogenic | frameshift_variant | MSKCC          |
| APC | I1287*      | Likely Oncogenic | stop_gained        | MSKCC          |
| APC | G1288*      | Likely Oncogenic | stop_gained        | COH/UCD; MSKCC |
| APC | Q1291fs*9   | Likely Oncogenic | frameshift_variant | COH/UCD        |
| APC | Q1291*      | Likely Oncogenic | stop_gained        | MSKCC          |
| APC | Q1291E      | Unknown          | missense_variant   | MSKCC          |
| APC | T1292Nfs*15 | Likely Oncogenic | frameshift_variant | MSKCC          |
| APC | Q1294*      | Likely Oncogenic | stop_gained        | COH/UCD; MSKCC |
| APC | E1295*      | Likely Oncogenic | stop_gained        | COH/UCD; MSKCC |
| APC | E1295Rfs*11 | Likely Oncogenic | frameshift_variant | MSKCC          |
| APC | A1296Gfs*9  | Likely Oncogenic | frameshift_variant | MSKCC          |
| APC | D1297Efs*3  | Likely Oncogenic | frameshift_variant | MSKCC          |
| APC | D1297Efs*9  | Likely Oncogenic | frameshift_variant | MSKCC          |
| APC | S1298Lfs*7  | Likely Oncogenic | frameshift_variant | MSKCC          |
| APC | A1299fs*6   | Likely Oncogenic | frameshift_variant | COH/UCD        |
| APC | A1299Lfs*6  | Likely Oncogenic | frameshift_variant | MSKCC          |
| APC | T1301Nfs*14 | Likely Oncogenic | frameshift_variant | MSKCC          |
| APC | T1301Sfs*10 | Likely Oncogenic | frameshift_variant | MSKCC          |
| APC | L1302fs*3   | Likely Oncogenic | frameshift_variant | COH/UCD        |
| APC | L1302Pfs*13 | Likely Oncogenic | frameshift_variant | MSKCC          |
| APC | Q1303fs*5   | Likely Oncogenic | frameshift_variant | COH/UCD        |
| APC | Q1303*      | Likely Oncogenic | stop_gained        | COH/UCD; MSKCC |
| APC | E1306*      | Likely Oncogenic | stop_gained        | COH/UCD; MSKCC |
| APC | E1306Kfs*9  | Likely Oncogenic | frameshift_variant | MSKCC          |
| APC | I1307K      | Likely Oncogenic | missense_variant   | COH/UCD; MSKCC |
| APC | I1307Nfs*8  | Likely Oncogenic | frameshift_variant | MSKCC          |
| APC | K1308*      | Likely Oncogenic | stop_gained        | COH/UCD        |
| APC | E1309fs*4   | Likely Oncogenic | frameshift_variant | COH/UCD        |
| APC | E1309fs*5   | Likely Oncogenic | frameshift_variant | COH/UCD        |
| APC | E1309fs*6   | Likely Oncogenic | frameshift_variant | COH/UCD        |
| APC | E1309*      | Likely Oncogenic | stop_gained        | COH/UCD; MSKCC |
| APC | E1309Dfs*4  | Likely Oncogenic | frameshift_variant | MSKCC          |
| APC | E1309Kfs*5  | Likely Oncogenic | frameshift_variant | MSKCC          |
| APC | E1309Rfs*6  | Likely Oncogenic | frameshift_variant | MSKCC          |
| APC | E1309Rfs*11 | Likely Oncogenic | frameshift_variant | MSKCC          |
| APC | K1310fs*11  | Likely Oncogenic | frameshift_variant | COH/UCD        |
| APC | K1310*      | Likely Oncogenic | stop_gained        | COH/UCD        |
| APC | I1311Dfs*4  | Likely Oncogenic | frameshift_variant | MSKCC          |
| APC | I1311Lfs*10 | Likely Oncogenic | frameshift_variant | MSKCC          |
| APC | I1311Mfs*10 | Likely Oncogenic | frameshift_variant | MSKCC          |
| APC | G1312*      | Likely Oncogenic | stop_gained        | COH/UCD; MSKCC |
| APC | G1312Efs*9  | Likely Oncogenic | frameshift_variant | MSKCC          |
| APC | R1314Sfs*7  | Likely Oncogenic | frameshift_variant | MSKCC          |
| APC | S1315*      | Likely Oncogenic | stop_gained        | MSKCC          |
| APC | A1316fs*5   | Likely Oncogenic | frameshift_variant | COH/UCD        |
| APC | E1317*      | Likely Oncogenic | stop_gained        | MSKCC          |
| APC | P1319fs*12  | Likely Oncogenic | frameshift_variant | COH/UCD        |
| APC | P1319Lfs*2  | Likely Oncogenic | frameshift_variant | MSKCC          |
| APC | V1320fs*11  | Likely Oncogenic | frameshift_variant | COH/UCD        |
| APC | V1320Afs*3  | Likely Oncogenic | frameshift_variant | MSKCC          |
| APC | V1320Efs*11 | Likely Oncogenic | frameshift_variant | MSKCC          |
| APC | E1322*      | Likely Oncogenic | stop_gained        | MSKCC          |
| APC | E1322Kfs*93 | Likely Oncogenic | frameshift_variant | MSKCC          |
| APC | E1322Pfs*10 | Likely Oncogenic | frameshift_variant | MSKCC          |
| APC | V1323Afs*8  | Likely Oncogenic | frameshift_variant | MSKCC          |
| APC | P1324fs*91  | Likely Oncogenic | frameshift_variant | COH/UCD        |
| APC | V1326fs*4   | Likely Oncogenic | frameshift_variant | COH/UCD        |
| APC | S1327*      | Likely Oncogenic | stop_gained        | COH/UCD; MSKCC |

Supplementary Table S1

|     |                     |                  |                    |                |
|-----|---------------------|------------------|--------------------|----------------|
| APC | Q1328*              | Likely Oncogenic | stop_gained        | COH/UCD; MSKCC |
| APC | Q1328Afs*3          | Likely Oncogenic | frameshift_variant | MSKCC          |
| APC | Q1328Pfs*11         | Likely Oncogenic | frameshift_variant | MSKCC          |
| APC | Q1328Tfs*4          | Likely Oncogenic | frameshift_variant | MSKCC          |
| APC | P1330Qfs*9          | Likely Oncogenic | frameshift_variant | MSKCC          |
| APC | R1331*              | Likely Oncogenic | stop_gained        | MSKCC          |
| APC | T1332Nfs*10         | Likely Oncogenic | frameshift_variant | MSKCC          |
| APC | K1333*              | Likely Oncogenic | stop_gained        | MSKCC          |
| APC | S1334lfs*8          | Likely Oncogenic | frameshift_variant | MSKCC          |
| APC | Q1338*              | Likely Oncogenic | stop_gained        | COH/UCD; MSKCC |
| APC | G1339lfs*12         | Likely Oncogenic | frameshift_variant | MSKCC          |
| APC | L1342fs*12          | Likely Oncogenic | frameshift_variant | COH/UCD        |
| APC | L1342Yfs*73         | Likely Oncogenic | frameshift_variant | MSKCC          |
| APC | S1344fs*10          | Likely Oncogenic | frameshift_variant | COH/UCD        |
| APC | S1344*              | Likely Oncogenic | stop_gained        | MSKCC          |
| APC | E1345*              | Likely Oncogenic | stop_gained        | COH/UCD; MSKCC |
| APC | S1346*              | Likely Oncogenic | stop_gained        | MSKCC          |
| APC | S1346lfs*8          | Likely Oncogenic | frameshift_variant | MSKCC          |
| APC | S1346_E1353delins*  | Unknown          | inframe_deletion   | MSKCC          |
| APC | A1347Qfs*4          | Likely Oncogenic | frameshift_variant | MSKCC          |
| APC | H1349Y              | Unknown          | missense_variant   | MSKCC          |
| APC | K1350T              | Unknown          | missense_variant   | MSKCC          |
| APC | A1351_V1352insQAQ   | Unknown          | inframe_insertion  | MSKCC          |
| APC | E1353fs*20          | Likely Oncogenic | frameshift_variant | COH/UCD        |
| APC | E1353*              | Likely Oncogenic | stop_gained        | COH/UCD; MSKCC |
| APC | E1353Dfs*21         | Likely Oncogenic | frameshift_variant | MSKCC          |
| APC | E1353Vfs*20         | Likely Oncogenic | frameshift_variant | MSKCC          |
| APC | E1353Vfs*19         | Likely Oncogenic | frameshift_variant | MSKCC          |
| APC | F1354fs*15          | Likely Oncogenic | frameshift_variant | COH/UCD        |
| APC | S1355fs*19          | Likely Oncogenic | frameshift_variant | COH/UCD        |
| APC | S1355Ffs*19         | Likely Oncogenic | frameshift_variant | MSKCC          |
| APC | S1355lfs*15         | Likely Oncogenic | frameshift_variant | MSKCC          |
| APC | S1356*              | Likely Oncogenic | stop_gained        | COH/UCD; MSKCC |
| APC | G1357*              | Likely Oncogenic | stop_gained        | MSKCC          |
| APC | A1358_K1359delinsS* | Unknown          | inframe_deletion   | MSKCC          |
| APC | K1359*              | Likely Oncogenic | stop_gained        | MSKCC          |
| APC | K1363*              | Likely Oncogenic | stop_gained        | COH/UCD; MSKCC |
| APC | K1363lfs*12         | Likely Oncogenic | frameshift_variant | MSKCC          |
| APC | S1364fs*11          | Likely Oncogenic | frameshift_variant | COH/UCD        |
| APC | Q1367fs*7           | Likely Oncogenic | frameshift_variant | COH/UCD        |
| APC | Q1367*              | Likely Oncogenic | stop_gained        | COH/UCD; MSKCC |
| APC | Q1367Pfs*10         | Likely Oncogenic | frameshift_variant | MSKCC          |
| APC | P1372Tfs*2          | Likely Oncogenic | frameshift_variant | MSKCC          |
| APC | E1374fs*11          | Likely Oncogenic | frameshift_variant | COH/UCD        |
| APC | E1374*              | Likely Oncogenic | stop_gained        | COH/UCD; MSKCC |
| APC | E1374Dfs*41         | Likely Oncogenic | frameshift_variant | MSKCC          |
| APC | E1374Gfs*12         | Likely Oncogenic | frameshift_variant | MSKCC          |
| APC | H1375fs*10          | Likely Oncogenic | frameshift_variant | COH/UCD        |
| APC | Y1376fs*10          | Likely Oncogenic | frameshift_variant | COH/UCD        |
| APC | Y1376fs*9           | Likely Oncogenic | frameshift_variant | COH/UCD        |
| APC | Y1376*              | Likely Oncogenic | stop_gained        | MSKCC          |
| APC | Y1376Cfs*9          | Likely Oncogenic | frameshift_variant | MSKCC          |
| APC | V1377Sfs*8          | Likely Oncogenic | frameshift_variant | MSKCC          |
| APC | Q1378*              | Likely Oncogenic | stop_gained        | COH/UCD; MSKCC |
| APC | E1379*              | Likely Oncogenic | stop_gained        | COH/UCD; MSKCC |
| APC | E1379Gfs*7          | Likely Oncogenic | frameshift_variant | MSKCC          |
| APC | L1382Hfs*3          | Likely Oncogenic | frameshift_variant | MSKCC          |
| APC | L1382Tfs*4          | Likely Oncogenic | frameshift_variant | MSKCC          |
| APC | M1383Vfs*2          | Likely Oncogenic | frameshift_variant | MSKCC          |
| APC | R1386*              | Likely Oncogenic | stop_gained        | MSKCC          |
| APC | R1386S              | Unknown          | missense_variant   | MSKCC          |
| APC | T1388Qfs*4          | Likely Oncogenic | frameshift_variant | MSKCC          |
| APC | S1389fs*26          | Likely Oncogenic | frameshift_variant | COH/UCD        |
| APC | S1392fs*1           | Likely Oncogenic | frameshift_variant | COH/UCD        |
| APC | S1392*              | Likely Oncogenic | stop_gained        | COH/UCD; MSKCC |
| APC | L1393Nfs*23         | Likely Oncogenic | frameshift_variant | MSKCC          |
| APC | L1393R              | Unknown          | missense_variant   | COH/UCD        |
| APC | D1394lfs*21         | Likely Oncogenic | frameshift_variant | MSKCC          |
| APC | D1394Vfs*21         | Likely Oncogenic | frameshift_variant | MSKCC          |
| APC | S1395fs*3           | Likely Oncogenic | frameshift_variant | COH/UCD        |
| APC | F1396fs*19          | Likely Oncogenic | frameshift_variant | COH/UCD        |
| APC | F1396Lfs*19         | Likely Oncogenic | frameshift_variant | MSKCC          |
| APC | E1397fs*1           | Likely Oncogenic | frameshift_variant | COH/UCD        |
| APC | E1397*              | Likely Oncogenic | stop_gained        | COH/UCD; MSKCC |
| APC | E1397Gfs*18         | Likely Oncogenic | frameshift_variant | MSKCC          |
| APC | R1399fs*9           | Likely Oncogenic | frameshift_variant | COH/UCD        |
| APC | R1399Ffs*9          | Likely Oncogenic | frameshift_variant | MSKCC          |
| APC | R1399Lfs*16         | Likely Oncogenic | frameshift_variant | MSKCC          |
| APC | S1400fs*1           | Likely Oncogenic | frameshift_variant | COH/UCD        |

Supplementary Table S1

|     |                |                  |                    |                |
|-----|----------------|------------------|--------------------|----------------|
| APC | S1400*         | Likely Oncogenic | stop_gained        | COH/UCD; MSKCC |
| APC | A1402Cfs*7     | Likely Oncogenic | frameshift_variant | MSKCC          |
| APC | S1403Afs*12    | Likely Oncogenic | frameshift_variant | MSKCC          |
| APC | Q1406*         | Likely Oncogenic | stop_gained        | COH/UCD; MSKCC |
| APC | S1407*         | Likely Oncogenic | stop_gained        | MSKCC          |
| APC | S1407_P1639del | Unknown          | inframe_deletion   | MSKCC          |
| APC | E1408*         | Likely Oncogenic | stop_gained        | COH/UCD; MSKCC |
| APC | S1411fs*3      | Likely Oncogenic | frameshift_variant | COH/UCD        |
| APC | S1411Rfs*4     | Likely Oncogenic | frameshift_variant | MSKCC          |
| APC | G1412*         | Likely Oncogenic | stop_gained        | MSKCC          |
| APC | M1413Wfs*2     | Likely Oncogenic | frameshift_variant | MSKCC          |
| APC | V1414fs*1      | Likely Oncogenic | frameshift_variant | COH/UCD        |
| APC | V1414fs*5      | Likely Oncogenic | frameshift_variant | COH/UCD        |
| APC | V1414*         | Likely Oncogenic | stop_gained        | MSKCC          |
| APC | V1414Afs*3     | Likely Oncogenic | frameshift_variant | MSKCC          |
| APC | S1415fs*3      | Likely Oncogenic | frameshift_variant | COH/UCD        |
| APC | S1415fs*4      | Likely Oncogenic | frameshift_variant | COH/UCD        |
| APC | S1415Ifs*5     | Likely Oncogenic | frameshift_variant | MSKCC          |
| APC | S1415Kfs*8     | Likely Oncogenic | frameshift_variant | MSKCC          |
| APC | S1415Nfs*5     | Likely Oncogenic | frameshift_variant | MSKCC          |
| APC | S1415Rfs*4     | Likely Oncogenic | frameshift_variant | MSKCC          |
| APC | I1418*         | Likely Oncogenic | stop_gained        | MSKCC          |
| APC | I1418Nfs*5     | Likely Oncogenic | frameshift_variant | MSKCC          |
| APC | S1421Vfs*52    | Likely Oncogenic | frameshift_variant | MSKCC          |
| APC | L1423fs*50     | Likely Oncogenic | frameshift_variant | COH/UCD        |
| APC | P1424Qfs*49    | Likely Oncogenic | frameshift_variant | MSKCC          |
| APC | P1427Qfs*40    | Likely Oncogenic | frameshift_variant | MSKCC          |
| APC | G1428Dfs*45    | Likely Oncogenic | frameshift_variant | MSKCC          |
| APC | Q1429*         | Likely Oncogenic | stop_gained        | COH/UCD; MSKCC |
| APC | Q1429Kfs*44    | Likely Oncogenic | frameshift_variant | MSKCC          |
| APC | T1430fs*43     | Likely Oncogenic | frameshift_variant | COH/UCD        |
| APC | M1431Efs*38    | Likely Oncogenic | frameshift_variant | MSKCC          |
| APC | P1432fs*41     | Likely Oncogenic | frameshift_variant | COH/UCD        |
| APC | R1435Hfs*32    | Likely Oncogenic | frameshift_variant | MSKCC          |
| APC | R1435Kfs*38    | Likely Oncogenic | frameshift_variant | MSKCC          |
| APC | R1435Nfs*32    | Likely Oncogenic | frameshift_variant | MSKCC          |
| APC | S1436Kfs*38    | Likely Oncogenic | frameshift_variant | MSKCC          |
| APC | S1436Vfs*37    | Likely Oncogenic | frameshift_variant | MSKCC          |
| APC | T1438fs*35     | Likely Oncogenic | frameshift_variant | COH/UCD        |
| APC | T1438Hfs*35    | Likely Oncogenic | frameshift_variant | MSKCC          |
| APC | T1438Nfs*36    | Likely Oncogenic | frameshift_variant | MSKCC          |
| APC | T1438Yfs*35    | Likely Oncogenic | frameshift_variant | MSKCC          |
| APC | P1439Lfs*34    | Likely Oncogenic | frameshift_variant | MSKCC          |
| APC | P1440fs*33     | Likely Oncogenic | frameshift_variant | COH/UCD        |
| APC | P1440Sfs*17    | Likely Oncogenic | frameshift_variant | MSKCC          |
| APC | P1441fs*31     | Likely Oncogenic | frameshift_variant | COH/UCD        |
| APC | P1441fs*32     | Likely Oncogenic | frameshift_variant | COH/UCD        |
| APC | P1441fs*34     | Likely Oncogenic | frameshift_variant | COH/UCD        |
| APC | P1442Tfs*33    | Likely Oncogenic | frameshift_variant | MSKCC          |
| APC | P1443fs*30     | Likely Oncogenic | frameshift_variant | COH/UCD        |
| APC | Q1444*         | Likely Oncogenic | stop_gained        | MSKCC          |
| APC | T1445Qfs*28    | Likely Oncogenic | frameshift_variant | MSKCC          |
| APC | Q1447*         | Likely Oncogenic | stop_gained        | COH/UCD; MSKCC |
| APC | T1448Nfs*7     | Likely Oncogenic | frameshift_variant | MSKCC          |
| APC | K1449Sfs*24    | Likely Oncogenic | frameshift_variant | MSKCC          |
| APC | R1450fs*23     | Likely Oncogenic | frameshift_variant | COH/UCD        |
| APC | R1450*         | Likely Oncogenic | stop_gained        | COH/UCD; MSKCC |
| APC | E1451*         | Likely Oncogenic | stop_gained        | COH/UCD        |
| APC | V1452fs*3      | Likely Oncogenic | frameshift_variant | COH/UCD        |
| APC | V1452Yfs*21    | Likely Oncogenic | frameshift_variant | MSKCC          |
| APC | P1453Lfs*20    | Likely Oncogenic | frameshift_variant | MSKCC          |
| APC | P1453Tfs*21    | Likely Oncogenic | frameshift_variant | MSKCC          |
| APC | K1454fs*20     | Likely Oncogenic | frameshift_variant | COH/UCD        |
| APC | K1454N         | Unknown          | missense_variant   | MSKCC          |
| APC | N1455fs*18     | Likely Oncogenic | frameshift_variant | COH/UCD        |
| APC | N1455Ifs*18    | Likely Oncogenic | frameshift_variant | MSKCC          |
| APC | N1455Kfs*2     | Likely Oncogenic | frameshift_variant | MSKCC          |
| APC | K1456*         | Likely Oncogenic | stop_gained        | MSKCC          |
| APC | P1458fs*4      | Likely Oncogenic | frameshift_variant | COH/UCD        |
| APC | T1459Kfs*6     | Likely Oncogenic | frameshift_variant | MSKCC          |
| APC | A1460Lfs*13    | Likely Oncogenic | frameshift_variant | MSKCC          |
| APC | R1463fs*6      | Likely Oncogenic | frameshift_variant | COH/UCD        |
| APC | E1464fs*8      | Likely Oncogenic | frameshift_variant | COH/UCD        |
| APC | E1464Vfs*8     | Likely Oncogenic | frameshift_variant | MSKCC          |
| APC | E1464V         | Unknown          | missense_variant   | MSKCC          |
| APC | S1465fs*3      | Likely Oncogenic | frameshift_variant | COH/UCD        |
| APC | S1465fs*8      | Likely Oncogenic | frameshift_variant | COH/UCD        |
| APC | S1465fs*9      | Likely Oncogenic | frameshift_variant | COH/UCD        |
| APC | S1465Rfs*9     | Likely Oncogenic | frameshift_variant | MSKCC          |

Supplementary Table S1

|     |             |                  |                    |                |
|-----|-------------|------------------|--------------------|----------------|
| APC | S1465Rfs*8  | Likely Oncogenic | frameshift_variant | MSKCC          |
| APC | S1465Wfs*3  | Likely Oncogenic | frameshift_variant | MSKCC          |
| APC | K1468*      | Likely Oncogenic | stop_gained        | COH/UCD; MSKCC |
| APC | Q1469*      | Likely Oncogenic | stop_gained        | COH/UCD        |
| APC | Q1469Mfs*34 | Likely Oncogenic | frameshift_variant | MSKCC          |
| APC | V1472Efs*35 | Likely Oncogenic | frameshift_variant | MSKCC          |
| APC | N1473Mfs*34 | Likely Oncogenic | frameshift_variant | MSKCC          |
| APC | Q1477*      | Likely Oncogenic | stop_gained        | MSKCC          |
| APC | Q1477H      | Unknown          | missense_variant   | COH/UCD        |
| APC | P1483fs*16  | Likely Oncogenic | frameshift_variant | COH/UCD        |
| APC | A1485Dfs*26 | Likely Oncogenic | frameshift_variant | MSKCC          |
| APC | D1486fs*21  | Likely Oncogenic | frameshift_variant | COH/UCD        |
| APC | D1486Efs*21 | Likely Oncogenic | frameshift_variant | MSKCC          |
| APC | D1486Efs*30 | Likely Oncogenic | frameshift_variant | MSKCC          |
| APC | D1486Ifs*21 | Likely Oncogenic | frameshift_variant | MSKCC          |
| APC | T1487Ifs*25 | Likely Oncogenic | frameshift_variant | MSKCC          |
| APC | T1487Lfs*16 | Likely Oncogenic | frameshift_variant | MSKCC          |
| APC | T1487Nfs*20 | Likely Oncogenic | frameshift_variant | MSKCC          |
| APC | T1487Nfs*27 | Likely Oncogenic | frameshift_variant | MSKCC          |
| APC | T1487Yfs*18 | Likely Oncogenic | frameshift_variant | MSKCC          |
| APC | L1488fs*18  | Likely Oncogenic | frameshift_variant | COH/UCD        |
| APC | L1488fs*19  | Likely Oncogenic | frameshift_variant | COH/UCD        |
| APC | L1488fs*25  | Likely Oncogenic | frameshift_variant | COH/UCD        |
| APC | L1488fs*26  | Likely Oncogenic | frameshift_variant | COH/UCD        |
| APC | L1488*      | Likely Oncogenic | stop_gained        | COH/UCD        |
| APC | L1488Ffs*19 | Likely Oncogenic | frameshift_variant | MSKCC          |
| APC | L1488Ffs*26 | Likely Oncogenic | frameshift_variant | MSKCC          |
| APC | L1488Ffs*25 | Likely Oncogenic | frameshift_variant | MSKCC          |
| APC | L1488Ffs*23 | Likely Oncogenic | frameshift_variant | MSKCC          |
| APC | L1488Ffs*27 | Likely Oncogenic | frameshift_variant | MSKCC          |
| APC | L1488Yfs*19 | Likely Oncogenic | frameshift_variant | MSKCC          |
| APC | L1488Yfs*18 | Likely Oncogenic | frameshift_variant | MSKCC          |
| APC | L1489fs*23  | Likely Oncogenic | frameshift_variant | COH/UCD        |
| APC | L1489Ffs*18 | Likely Oncogenic | frameshift_variant | MSKCC          |
| APC | L1489Pfs*15 | Likely Oncogenic | frameshift_variant | MSKCC          |
| APC | L1489Yfs*18 | Likely Oncogenic | frameshift_variant | MSKCC          |
| APC | H1490fs*24  | Likely Oncogenic | frameshift_variant | COH/UCD        |
| APC | H1490Ffs*23 | Likely Oncogenic | frameshift_variant | MSKCC          |
| APC | H1490Pfs*15 | Likely Oncogenic | frameshift_variant | MSKCC          |
| APC | H1490Qfs*18 | Likely Oncogenic | frameshift_variant | MSKCC          |
| APC | F1491fs*22  | Likely Oncogenic | frameshift_variant | COH/UCD        |
| APC | F1491Lfs*16 | Likely Oncogenic | frameshift_variant | MSKCC          |
| APC | A1492Cfs*22 | Likely Oncogenic | frameshift_variant | MSKCC          |
| APC | A1492Dfs*22 | Likely Oncogenic | frameshift_variant | MSKCC          |
| APC | A1492Vfs*12 | Likely Oncogenic | frameshift_variant | MSKCC          |
| APC | T1493fs*14  | Likely Oncogenic | frameshift_variant | COH/UCD        |
| APC | T1493Rfs*14 | Likely Oncogenic | frameshift_variant | MSKCC          |
| APC | E1494Vfs*12 | Likely Oncogenic | frameshift_variant | MSKCC          |
| APC | S1495fs*19  | Likely Oncogenic | frameshift_variant | COH/UCD        |
| APC | S1495Vfs*12 | Likely Oncogenic | frameshift_variant | MSKCC          |
| APC | T1496fs*18  | Likely Oncogenic | frameshift_variant | COH/UCD        |
| APC | P1497fs*14  | Likely Oncogenic | frameshift_variant | COH/UCD        |
| APC | P1497Ffs*7  | Likely Oncogenic | frameshift_variant | MSKCC          |
| APC | P1497Qfs*10 | Likely Oncogenic | frameshift_variant | MSKCC          |
| APC | D1498fs*5   | Likely Oncogenic | frameshift_variant | COH/UCD        |
| APC | G1499A      | Unknown          | missense_variant   | COH/UCD        |
| APC | G1499Dfs*8  | Likely Oncogenic | frameshift_variant | MSKCC          |
| APC | S1501fs*6   | Likely Oncogenic | frameshift_variant | COH/UCD        |
| APC | S1501Lfs*6  | Likely Oncogenic | frameshift_variant | MSKCC          |
| APC | L1511Hfs*9  | Likely Oncogenic | frameshift_variant | MSKCC          |
| APC | L1511Rfs*2  | Likely Oncogenic | frameshift_variant | MSKCC          |
| APC | D1512N      | Unknown          | missense_variant   | COH/UCD        |
| APC | E1513Dfs*10 | Likely Oncogenic | frameshift_variant | MSKCC          |
| APC | D1519Y      | Unknown          | missense_variant   | COH/UCD        |
| APC | E1521*      | Likely Oncogenic | stop_gained        | MSKCC          |
| APC | V1528Ffs*37 | Likely Oncogenic | frameshift_variant | MSKCC          |
| APC | E1530*      | Likely Oncogenic | stop_gained        | COH/UCD        |
| APC | N1531fs*2   | Likely Oncogenic | frameshift_variant | COH/UCD        |
| APC | N1531Kfs*2  | Likely Oncogenic | frameshift_variant | MSKCC          |
| APC | N1531Mfs*34 | Likely Oncogenic | frameshift_variant | MSKCC          |
| APC | N1533Mfs*30 | Likely Oncogenic | frameshift_variant | MSKCC          |
| APC | E1536*      | Likely Oncogenic | stop_gained        | COH/UCD        |
| APC | E1538fs*5   | Likely Oncogenic | frameshift_variant | COH/UCD        |
| APC | E1538K      | Unknown          | missense_variant   | COH/UCD        |
| APC | E1538Nfs*27 | Likely Oncogenic | frameshift_variant | MSKCC          |
| APC | E1540*      | Likely Oncogenic | stop_gained        | COH/UCD        |
| APC | E1540Afs*3  | Likely Oncogenic | frameshift_variant | MSKCC          |
| APC | E1540Kfs*22 | Likely Oncogenic | frameshift_variant | MSKCC          |
| APC | E1544Kfs*74 | Likely Oncogenic | frameshift_variant | MSKCC          |

Supplementary Table S1



|      |                  |                  |                    |                |
|------|------------------|------------------|--------------------|----------------|
| APC  | E1544Rfs*4       | Likely Oncogenic | frameshift_variant | MSKCC          |
| APC  | S1545*           | Likely Oncogenic | stop_gained        | COH/UCD        |
| APC  | E1547*           | Likely Oncogenic | stop_gained        | COH/UCD        |
| APC  | K1551Rfs*13      | Likely Oncogenic | frameshift_variant | MSKCC          |
| APC  | E1554*           | Likely Oncogenic | stop_gained        | COH/UCD        |
| APC  | E1554Kfs*11      | Likely Oncogenic | frameshift_variant | MSKCC          |
| APC  | T1556fs*3        | Likely Oncogenic | frameshift_variant | COH/UCD        |
| APC  | T1556fs*9        | Likely Oncogenic | frameshift_variant | COH/UCD        |
| APC  | T1556Lfs*9       | Likely Oncogenic | frameshift_variant | MSKCC          |
| APC  | T1556Nfs*3       | Likely Oncogenic | frameshift_variant | MSKCC          |
| APC  | I1557fs*1        | Likely Oncogenic | frameshift_variant | COH/UCD        |
| APC  | K1561Rfs*4       | Likely Oncogenic | frameshift_variant | MSKCC          |
| APC  | D1562fs*5        | Likely Oncogenic | frameshift_variant | COH/UCD        |
| APC  | D1562Cfs*5       | Likely Oncogenic | frameshift_variant | MSKCC          |
| APC  | E1573*           | Likely Oncogenic | stop_gained        | COH/UCD        |
| APC  | I1574Yfs*2       | Likely Oncogenic | frameshift_variant | MSKCC          |
| APC  | L1575Rfs*67      | Likely Oncogenic | frameshift_variant | MSKCC          |
| APC  | E1577*           | Likely Oncogenic | stop_gained        | COH/UCD        |
| APC  | C1578fs*71       | Likely Oncogenic | frameshift_variant | COH/UCD        |
| APC  | C1578Lfs*72      | Likely Oncogenic | frameshift_variant | MSKCC          |
| APC  | C1578Yfs*12      | Likely Oncogenic | frameshift_variant | MSKCC          |
| APC  | I1580fs*9        | Likely Oncogenic | frameshift_variant | COH/UCD        |
| APC  | I1580*           | Likely Oncogenic | stop_gained        | MSKCC          |
| APC  | I1580Ffs*70      | Likely Oncogenic | frameshift_variant | MSKCC          |
| APC  | S1581Lfs*69      | Likely Oncogenic | frameshift_variant | MSKCC          |
| APC  | Q1627P           | Unknown          | missense_variant   | MSKCC          |
| APC  | T1633Yfs*7       | Likely Oncogenic | frameshift_variant | MSKCC          |
| APC  | P1639S           | Unknown          | missense_variant   | MSKCC          |
| APC  | V1641M           | Unknown          | missense_variant   | MSKCC          |
| APC  | S1652P           | Unknown          | missense_variant   | MSKCC          |
| APC  | E1673G           | Unknown          | missense_variant   | MSKCC          |
| APC  | E1673_R1676del   | Unknown          | inframe_deletion   | MSKCC          |
| APC  | G1702E           | Unknown          | missense_variant   | COH/UCD        |
| APC  | C1727*           | Likely Oncogenic | stop_gained        | COH/UCD        |
| APC  | E1891K           | Unknown          | missense_variant   | MSKCC          |
| APC  | D1939Y           | Unknown          | missense_variant   | COH/UCD        |
| APC  | S2125F           | Unknown          | missense_variant   | MSKCC          |
| APC  | R2166Q           | Unknown          | missense_variant   | MSKCC          |
| APC  | R2237*           | Likely Oncogenic | stop_gained        | MSKCC          |
| APC  | A2286V           | Unknown          | missense_variant   | COH/UCD        |
| APC  | P2346S           | Unknown          | missense_variant   | COH/UCD        |
| APC  | P2369S           | Unknown          | missense_variant   | COH/UCD        |
| APC  | R2439C           | Unknown          | missense_variant   | MSKCC          |
| APC  | R2505Q           | Unknown          | missense_variant   | MSKCC          |
| APC  | R2530W           | Unknown          | missense_variant   | MSKCC          |
| APC  | H2551L           | Unknown          | missense_variant   | COH/UCD        |
| APC  | S2594C           | Unknown          | missense_variant   | COH/UCD        |
| APC  | R2714C           | Unknown          | missense_variant   | MSKCC          |
| APC  | V2777A           | Unknown          | missense_variant   | COH/UCD        |
| APC  | HOMDEL           | Likely Oncogenic | gene_loss          | COH/UCD; MSKCC |
| APC  | intron fusion    | Likely Oncogenic | rearrangement      | COH/UCD        |
| APC  | APC-intragenic   | Likely Oncogenic | rearrangement      | MSKCC          |
| APC  | APC-PCSK1 fusion | Likely Oncogenic | rearrangement      | MSKCC          |
| APC  | APC-PRMT8 fusion | Likely Oncogenic | rearrangement      | MSKCC          |
| APC  | MCC-APC fusion   | Likely Oncogenic | rearrangement      | COH/UCD        |
| APC  | REEP5-APC fusion | Likely Oncogenic | rearrangement      | MSKCC          |
| KRAS | K5E              | Likely Oncogenic | missense_variant   | MSKCC          |
| KRAS | G10_A11insE      | Oncogenic        | inframe_insertion  | MSKCC          |
| KRAS | G12A             | Oncogenic        | missense_variant   | COH/UCD; MSKCC |
| KRAS | G12C             | Oncogenic        | missense_variant   | COH/UCD; MSKCC |
| KRAS | G12D             | Oncogenic        | missense_variant   | COH/UCD; MSKCC |
| KRAS | G12F             | Likely Oncogenic | missense_variant   | MSKCC          |
| KRAS | G12R             | Oncogenic        | missense_variant   | MSKCC          |
| KRAS | G12S             | Oncogenic        | missense_variant   | COH/UCD; MSKCC |
| KRAS | G12V             | Oncogenic        | missense_variant   | COH/UCD; MSKCC |
| KRAS | G13C             | Oncogenic        | missense_variant   | MSKCC          |
| KRAS | G13D             | Oncogenic        | missense_variant   | COH/UCD; MSKCC |
| KRAS | G13V             | Likely Oncogenic | missense_variant   | MSKCC          |
| KRAS | L19F             | Oncogenic        | missense_variant   | COH/UCD        |
| KRAS | T20M             | Unknown          | missense_variant   | MSKCC          |
| KRAS | Q22K             | Oncogenic        | missense_variant   | COH/UCD        |
| KRAS | D33E             | Oncogenic        | missense_variant   | MSKCC          |
| KRAS | K42R             | Unknown          | missense_variant   | COH/UCD        |
| KRAS | A59T             | Likely Oncogenic | missense_variant   | COH/UCD        |
| KRAS | Q61H             | Oncogenic        | missense_variant   | COH/UCD; MSKCC |
| KRAS | Q61K             | Likely Oncogenic | missense_variant   | COH/UCD; MSKCC |
| KRAS | Q61L             | Oncogenic        | missense_variant   | COH/UCD; MSKCC |
| KRAS | Q61R             | Oncogenic        | missense_variant   | COH/UCD; MSKCC |
| KRAS | E63K             | Likely Oncogenic | missense_variant   | COH/UCD        |

Supplementary Table S1

|      |                   |                     |                       |                |
|------|-------------------|---------------------|-----------------------|----------------|
| KRAS | R68S              | Predicted Oncogenic | missense_variant      | COH/UCD; MSKCC |
| KRAS | N116H             | Inconclusive        | missense_variant      | COH/UCD        |
| KRAS | N116T             | Unknown             | missense_variant      | COH/UCD        |
| KRAS | K117N             | Oncogenic           | missense_variant      | COH/UCD; MSKCC |
| KRAS | A146P             | Likely Oncogenic    | missense_variant      | MSKCC          |
| KRAS | A146T             | Oncogenic           | missense_variant      | COH/UCD; MSKCC |
| KRAS | A146V             | Likely Oncogenic    | missense_variant      | COH/UCD; MSKCC |
| KRAS | Q150R             | Unknown             | missense_variant      | COH/UCD        |
| KRAS | G179S             | Unknown             | missense_variant      | COH/UCD        |
| KRAS | K179N             | Unknown             | missense_variant      | COH/UCD        |
| KRAS | AMP               | Likely Oncogenic    | amplification         | COH/UCD; MSKCC |
| NRAS | G12A              | Likely Oncogenic    | missense_variant      | COH/UCD; MSKCC |
| NRAS | G12C              | Likely Oncogenic    | missense_variant      | MSKCC          |
| NRAS | G12D              | Oncogenic           | missense_variant      | COH/UCD; MSKCC |
| NRAS | G12V              | Oncogenic           | missense_variant      | MSKCC          |
| NRAS | G13C              | Likely Oncogenic    | missense_variant      | COH/UCD; MSKCC |
| NRAS | G13D              | Oncogenic           | missense_variant      | MSKCC          |
| NRAS | G13R              | Likely Oncogenic    | missense_variant      | MSKCC          |
| NRAS | G60V              | Likely Oncogenic    | missense_variant      | MSKCC          |
| NRAS | Q61H              | Oncogenic           | missense_variant      | MSKCC          |
| NRAS | Q61K              | Oncogenic           | missense_variant      | COH/UCD; MSKCC |
| NRAS | Q61L              | Oncogenic           | missense_variant      | COH/UCD; MSKCC |
| NRAS | Q61R              | Oncogenic           | missense_variant      | COH/UCD; MSKCC |
| NRAS | A91V              | Unknown             | missense_variant      | MSKCC          |
| NRAS | HOMDEL            | Unknown             | gene_loss             | COH/UCD; MSKCC |
| NRAS | AMP               | Unknown             | amplification         | COH/UCD        |
| BRAF | E26D              | Unknown             | missense_variant      | COH/UCD        |
| BRAF | M53I              | Unknown             | missense_variant      | COH/UCD        |
| BRAF | F247L             | Likely Oncogenic    | missense_variant      | MSKCC          |
| BRAF | D284Efs*4         | Unknown             | frameshift_variant    | MSKCC          |
| BRAF | H353Y             | Unknown             | missense_variant      | COH/UCD        |
| BRAF | A404Cfs*9         | Unknown             | frameshift_variant    | MSKCC          |
| BRAF | R424Q             | Unknown             | missense_variant      | COH/UCD        |
| BRAF | G466E             | Oncogenic           | missense_variant      | COH/UCD        |
| BRAF | G466V             | Oncogenic           | missense_variant      | COH/UCD; MSKCC |
| BRAF | G469A             | Oncogenic           | missense_variant      | MSKCC          |
| BRAF | G469E             | Oncogenic           | missense_variant      | COH/UCD; MSKCC |
| BRAF | G469R             | Oncogenic           | missense_variant      | COH/UCD        |
| BRAF | Y472S             | Likely Oncogenic    | missense_variant      | MSKCC          |
| BRAF | E501K             | Inconclusive        | missense_variant      | MSKCC          |
| BRAF | R558Q             | Unknown             | missense_variant      | MSKCC          |
| BRAF | H574Y             | Likely Oncogenic    | missense_variant      | MSKCC          |
| BRAF | N581S             | Oncogenic           | missense_variant      | MSKCC          |
| BRAF | F583C             | Unknown             | missense_variant      | MSKCC          |
| BRAF | E586K             | Likely Oncogenic    | missense_variant      | COH/UCD        |
| BRAF | D594G             | Oncogenic           | missense_variant      | COH/UCD; MSKCC |
| BRAF | D594N             | Oncogenic           | missense_variant      | COH/UCD; MSKCC |
| BRAF | D594V             | Likely Oncogenic    | missense_variant      | MSKCC          |
| BRAF | G596R             | Oncogenic           | missense_variant      | MSKCC          |
| BRAF | L597R             | Likely Oncogenic    | missense_variant      | COH/UCD        |
| BRAF | T599delinsIP      | Oncogenic           | inframe_insertion     | MSKCC          |
| BRAF | V600E             | Oncogenic           | missense_variant      | COH/UCD; MSKCC |
| BRAF | K601E             | Likely Oncogenic    | missense_variant      | COH/UCD; MSKCC |
| BRAF | F642C             | Unknown             | missense_variant      | COH/UCD        |
| BRAF | AMP               | Unknown             | amplification         | MSKCC          |
| BRAF | CUL1-BRAF fusion  | Likely Oncogenic    | rearrangement         | MSKCC          |
| BRAF | AGAP3-BRAF fusion | Likely Oncogenic    | rearrangement         | MSKCC          |
| BRAF | MAP3K9-BRAFfusion | Likely Oncogenic    | rearrangement         | COH/UCD        |
| TP53 | M1K               | Likely Oncogenic    | start_loss            | COH/UCD        |
| TP53 | S20fs*24          | Likely Oncogenic    | frameshift_variant    | COH/UCD        |
| TP53 | K24Nfs*20         | Likely Oncogenic    | frameshift_variant    | MSKCC          |
| TP53 | E28Cfs*63         | Likely Oncogenic    | frameshift_variant    | MSKCC          |
| TP53 | N30Kfs*13         | Likely Oncogenic    | frameshift_variant    | MSKCC          |
| TP53 | V31I              | Unknown             | missense_variant      | COH/UCD        |
| TP53 | X32_splice        | Likely Oncogenic    | splice_region_variant | MSKCC          |
| TP53 | S33Ffs*12         | Likely Oncogenic    | frameshift_variant    | MSKCC          |
| TP53 | X33_splice        | Likely Oncogenic    | splice_region_variant | MSKCC          |
| TP53 | L35*              | Likely Oncogenic    | stop_gained           | MSKCC          |
| TP53 | L35Cfs*9          | Likely Oncogenic    | frameshift_variant    | MSKCC          |
| TP53 | E51fs*72          | Likely Oncogenic    | frameshift_variant    | COH/UCD        |
| TP53 | Q52fs*73          | Likely Oncogenic    | frameshift_variant    | COH/UCD        |
| TP53 | Q52*              | Likely Oncogenic    | stop_gained           | COH/UCD        |
| TP53 | TP53-GPS2 fusion  | Likely Oncogenic    | rearrangement         | MSKCC          |
| TP53 | TP53-intragenic   | Likely Oncogenic    | rearrangement         | MSKCC          |
| TP53 | W53*              | Likely Oncogenic    | stop_gained           | COH/UCD; MSKCC |
| TP53 | D61Vfs*62         | Likely Oncogenic    | frameshift_variant    | MSKCC          |
| TP53 | E62*              | Likely Oncogenic    | stop_gained           | COH/UCD        |
| TP53 | R65*              | Likely Oncogenic    | stop_gained           | MSKCC          |
| TP53 | P67Lfs*54         | Likely Oncogenic    | frameshift_variant    | MSKCC          |

Supplementary Table S1

|      |               |                  |                       |                |
|------|---------------|------------------|-----------------------|----------------|
| TP53 | E68fs*57      | Likely Oncogenic | frameshift_variant    | COH/UCD        |
| TP53 | E68Gfs*80     | Likely Oncogenic | frameshift_variant    | MSKCC          |
| TP53 | V73Gfs*50     | Likely Oncogenic | frameshift_variant    | MSKCC          |
| TP53 | V73Rfs*76     | Likely Oncogenic | frameshift_variant    | MSKCC          |
| TP53 | V73Wfs*50     | Likely Oncogenic | frameshift_variant    | MSKCC          |
| TP53 | A74Gfs*75     | Likely Oncogenic | frameshift_variant    | MSKCC          |
| TP53 | P75Lfs*48     | Likely Oncogenic | frameshift_variant    | MSKCC          |
| TP53 | T81Nfs*68     | Likely Oncogenic | frameshift_variant    | MSKCC          |
| TP53 | P87Lfs*59     | Likely Oncogenic | frameshift_variant    | MSKCC          |
| TP53 | S90Lfs*59     | Likely Oncogenic | frameshift_variant    | MSKCC          |
| TP53 | S90Pfs*33     | Likely Oncogenic | frameshift_variant    | MSKCC          |
| TP53 | W91*          | Likely Oncogenic | stop_gained           | COH/UCD; MSKCC |
| TP53 | L93Cfs*30     | Likely Oncogenic | frameshift_variant    | MSKCC          |
| TP53 | L93Vfs*55     | Likely Oncogenic | frameshift_variant    | MSKCC          |
| TP53 | S94*          | Likely Oncogenic | stop_gained           | COH/UCD        |
| TP53 | S94T          | Unknown          | missense_variant      | COH/UCD        |
| TP53 | S96del        | Unknown          | inframe_deletion      | MSKCC          |
| TP53 | S96fs*72      | Likely Oncogenic | frameshift_variant    | COH/UCD        |
| TP53 | S96fs*57      | Likely Oncogenic | frameshift_variant    | COH/UCD        |
| TP53 | V97fs*25      | Likely Oncogenic | frameshift_variant    | COH/UCD        |
| TP53 | Q100fs*23     | Likely Oncogenic | frameshift_variant    | COH/UCD        |
| TP53 | T102Nfs*47    | Likely Oncogenic | frameshift_variant    | MSKCC          |
| TP53 | Q104*         | Likely Oncogenic | stop_gained           | COH/UCD; MSKCC |
| TP53 | G105C         | Likely Oncogenic | missense_variant      | MSKCC          |
| TP53 | S106Qfs*43    | Likely Oncogenic | frameshift_variant    | MSKCC          |
| TP53 | Y107*         | Likely Oncogenic | stop_gained           | MSKCC          |
| TP53 | F109I         | Likely Oncogenic | missense_variant      | COH/UCD        |
| TP53 | F109Sfs*14    | Likely Oncogenic | frameshift_variant    | MSKCC          |
| TP53 | F109_R110insK | Likely Oncogenic | inframe_insertion     | MSKCC          |
| TP53 | R110C         | Likely Oncogenic | missense_variant      | COH/UCD        |
| TP53 | R110L         | Likely Oncogenic | missense_variant      | MSKCC          |
| TP53 | R110P         | Likely Oncogenic | missense_variant      | COH/UCD        |
| TP53 | L111Ffs*40    | Likely Oncogenic | frameshift_variant    | MSKCC          |
| TP53 | L111P         | Likely Oncogenic | missense_variant      | MSKCC          |
| TP53 | F113C         | Likely Oncogenic | missense_variant      | COH/UCD        |
| TP53 | F113S         | Likely Oncogenic | missense_variant      | COH/UCD        |
| TP53 | L114fs*9      | Likely Oncogenic | frameshift_variant    | COH/UCD        |
| TP53 | L114Cfs*9     | Likely Oncogenic | frameshift_variant    | MSKCC          |
| TP53 | H115fs*34     | Likely Oncogenic | frameshift_variant    | COH/UCD        |
| TP53 | H115Afs*34    | Likely Oncogenic | frameshift_variant    | MSKCC          |
| TP53 | H115Ffs*33    | Likely Oncogenic | frameshift_variant    | MSKCC          |
| TP53 | A119fs*2      | Likely Oncogenic | frameshift_variant    | COH/UCD        |
| TP53 | V122fs*26     | Likely Oncogenic | frameshift_variant    | COH/UCD        |
| TP53 | V122Dfs*26    | Likely Oncogenic | frameshift_variant    | MSKCC          |
| TP53 | C124G         | Likely Oncogenic | missense_variant      | MSKCC          |
| TP53 | C124Wfs*25    | Likely Oncogenic | frameshift_variant    | MSKCC          |
| TP53 | T125fs*26     | Likely Oncogenic | frameshift_variant    | COH/UCD        |
| TP53 | T125A         | Likely Oncogenic | missense_variant      | MSKCC          |
| TP53 | T125M         | Likely Oncogenic | missense_variant      | MSKCC          |
| TP53 | X125_splice   | Likely Oncogenic | splice_region_variant | COH/UCD; MSKCC |
| TP53 | X126_splice   | Likely Oncogenic | splice_region_variant | MSKCC          |
| TP53 | Y126delinsCN  | Likely Oncogenic | inframe_insertion     | MSKCC          |
| TP53 | Y126*         | Likely Oncogenic | stop_gained           | MSKCC          |
| TP53 | Y126C         | Likely Oncogenic | missense_variant      | COH/UCD; MSKCC |
| TP53 | Y126D         | Likely Oncogenic | missense_variant      | COH/UCD        |
| TP53 | Y126H         | Likely Oncogenic | missense_variant      | COH/UCD        |
| TP53 | S127F         | Likely Oncogenic | missense_variant      | MSKCC          |
| TP53 | L130F         | Likely Oncogenic | missense_variant      | MSKCC          |
| TP53 | L130Sfs*40    | Likely Oncogenic | frameshift_variant    | MSKCC          |
| TP53 | L130V         | Likely Oncogenic | missense_variant      | MSKCC          |
| TP53 | N131del       | Likely Oncogenic | inframe_deletion      | MSKCC          |
| TP53 | N131fs*27     | Likely Oncogenic | frameshift_variant    | COH/UCD        |
| TP53 | N131S         | Likely Oncogenic | missense_variant      | MSKCC          |
| TP53 | K132E         | Likely Oncogenic | missense_variant      | MSKCC          |
| TP53 | K132N         | Likely Oncogenic | missense_variant      | MSKCC          |
| TP53 | K132R         | Likely Oncogenic | missense_variant      | MSKCC          |
| TP53 | M133Dfs*16    | Likely Oncogenic | frameshift_variant    | MSKCC          |
| TP53 | M133Efs*38    | Likely Oncogenic | frameshift_variant    | MSKCC          |
| TP53 | M133K         | Likely Oncogenic | missense_variant      | COH/UCD        |
| TP53 | F134C         | Likely Oncogenic | missense_variant      | MSKCC          |
| TP53 | F134L         | Likely Oncogenic | missense_variant      | COH/UCD; MSKCC |
| TP53 | C135Afs*35    | Likely Oncogenic | frameshift_variant    | MSKCC          |
| TP53 | C135F         | Likely Oncogenic | missense_variant      | COH/UCD; MSKCC |
| TP53 | C135R         | Likely Oncogenic | missense_variant      | MSKCC          |
| TP53 | C135S         | Likely Oncogenic | missense_variant      | MSKCC          |
| TP53 | C135Y         | Likely Oncogenic | missense_variant      | COH/UCD; MSKCC |
| TP53 | Q136*         | Likely Oncogenic | stop_gained           | COH/UCD        |
| TP53 | A138P         | Likely Oncogenic | missense_variant      | MSKCC          |
| TP53 | A138V         | Likely Oncogenic | missense_variant      | COH/UCD; MSKCC |

Supplementary Table S1

|      |              |                  |                       |                |
|------|--------------|------------------|-----------------------|----------------|
| TP53 | C141Afs*29   | Likely Oncogenic | frameshift_variant    | MSKCC          |
| TP53 | C141Y        | Likely Oncogenic | missense_variant      | COH/UCD; MSKCC |
| TP53 | P142Afs*5    | Likely Oncogenic | frameshift_variant    | MSKCC          |
| TP53 | V143A        | Likely Oncogenic | missense_variant      | MSKCC          |
| TP53 | Q144Sfs*26   | Likely Oncogenic | frameshift_variant    | MSKCC          |
| TP53 | L145P        | Likely Oncogenic | missense_variant      | MSKCC          |
| TP53 | L145R        | Oncogenic        | missense_variant      | MSKCC          |
| TP53 | W146*        | Likely Oncogenic | stop_gained           | COH/UCD; MSKCC |
| TP53 | P151A        | Likely Oncogenic | missense_variant      | MSKCC          |
| TP53 | P151R        | Likely Oncogenic | missense_variant      | COH/UCD; MSKCC |
| TP53 | P151S        | Oncogenic        | missense_variant      | MSKCC          |
| TP53 | P152fs*14    | Likely Oncogenic | frameshift_variant    | COH/UCD        |
| TP53 | P152fs*18    | Likely Oncogenic | frameshift_variant    | COH/UCD        |
| TP53 | P152Afs*14   | Likely Oncogenic | frameshift_variant    | MSKCC          |
| TP53 | P152L        | Likely Oncogenic | missense_variant      | COH/UCD; MSKCC |
| TP53 | P153fs*28    | Likely Oncogenic | frameshift_variant    | COH/UCD        |
| TP53 | P153Afs*28   | Likely Oncogenic | frameshift_variant    | MSKCC          |
| TP53 | G154Afs*28   | Likely Oncogenic | frameshift_variant    | MSKCC          |
| TP53 | G154V        | Likely Oncogenic | missense_variant      | COH/UCD; MSKCC |
| TP53 | T155Hfs*26   | Likely Oncogenic | frameshift_variant    | MSKCC          |
| TP53 | T155N        | Likely Oncogenic | missense_variant      | COH/UCD        |
| TP53 | T155Pfs*28   | Likely Oncogenic | frameshift_variant    | MSKCC          |
| TP53 | R156Afs*14   | Likely Oncogenic | frameshift_variant    | MSKCC          |
| TP53 | R156P        | Likely Oncogenic | missense_variant      | MSKCC          |
| TP53 | V157F        | Likely Oncogenic | missense_variant      | MSKCC          |
| TP53 | V157_R158del | Likely Oncogenic | inframe_deletion      | MSKCC          |
| TP53 | R158C        | Likely Oncogenic | missense_variant      | COH/UCD        |
| TP53 | R158H        | Likely Oncogenic | missense_variant      | COH/UCD; MSKCC |
| TP53 | R158L        | Likely Oncogenic | missense_variant      | COH/UCD        |
| TP53 | A159V        | Likely Oncogenic | missense_variant      | MSKCC          |
| TP53 | A161S        | Likely Oncogenic | missense_variant      | MSKCC          |
| TP53 | A161T        | Likely Oncogenic | missense_variant      | COH/UCD; MSKCC |
| TP53 | Y163C        | Likely Oncogenic | missense_variant      | MSKCC          |
| TP53 | Y163Hfs*4    | Likely Oncogenic | frameshift_variant    | MSKCC          |
| TP53 | K164*        | Likely Oncogenic | stop_gained           | MSKCC          |
| TP53 | K164E        | Likely Oncogenic | missense_variant      | MSKCC          |
| TP53 | K164M        | Likely Oncogenic | missense_variant      | COH/UCD        |
| TP53 | S166*        | Likely Oncogenic | stop_gained           | COH/UCD; MSKCC |
| TP53 | Q167*        | Likely Oncogenic | stop_gained           | MSKCC          |
| TP53 | H168P        | Likely Oncogenic | missense_variant      | MSKCC          |
| TP53 | H168R        | Likely Oncogenic | missense_variant      | MSKCC          |
| TP53 | M169del      | Likely Oncogenic | inframe_deletion      | MSKCC          |
| TP53 | M169Ifs*12   | Likely Oncogenic | frameshift_variant    | MSKCC          |
| TP53 | X169_splice  | Likely Oncogenic | splice_region_variant | MSKCC          |
| TP53 | E171*        | Likely Oncogenic | stop_gained           | MSKCC          |
| TP53 | E171Rfs*3    | Likely Oncogenic | frameshift_variant    | MSKCC          |
| TP53 | V172F        | Likely Oncogenic | missense_variant      | MSKCC          |
| TP53 | V173fs*68    | Likely Oncogenic | frameshift_variant    | COH/UCD        |
| TP53 | V173L        | Likely Oncogenic | missense_variant      | COH/UCD; MSKCC |
| TP53 | V173M        | Likely Oncogenic | missense_variant      | MSKCC          |
| TP53 | V173W        | Likely Oncogenic | missense_variant      | COH/UCD        |
| TP53 | R175H        | Oncogenic        | missense_variant      | COH/UCD; MSKCC |
| TP53 | C176fs*5     | Likely Oncogenic | frameshift_variant    | COH/UCD        |
| TP53 | C176*        | Likely Oncogenic | stop_gained           | MSKCC          |
| TP53 | C176F        | Likely Oncogenic | missense_variant      | COH/UCD; MSKCC |
| TP53 | C176R        | Likely Oncogenic | missense_variant      | COH/UCD; MSKCC |
| TP53 | C176S        | Likely Oncogenic | missense_variant      | COH/UCD; MSKCC |
| TP53 | C176Y        | Likely Oncogenic | missense_variant      | MSKCC          |
| TP53 | P177_C182del | Likely Oncogenic | inframe_deletion      | MSKCC          |
| TP53 | H178fs*69    | Likely Oncogenic | frameshift_variant    | COH/UCD        |
| TP53 | H179D        | Likely Oncogenic | missense_variant      | MSKCC          |
| TP53 | H179P        | Likely Oncogenic | missense_variant      | MSKCC          |
| TP53 | H179Q        | Likely Oncogenic | missense_variant      | MSKCC          |
| TP53 | H179R        | Likely Oncogenic | missense_variant      | COH/UCD; MSKCC |
| TP53 | H179Y        | Likely Oncogenic | missense_variant      | MSKCC          |
| TP53 | R181H        | Likely Oncogenic | missense_variant      | MSKCC          |
| TP53 | S185Tfs*62   | Likely Oncogenic | frameshift_variant    | MSKCC          |
| TP53 | X187_splice  | Likely Oncogenic | splice_region_variant | COH/UCD; MSKCC |
| TP53 | A189Gfs*20   | Likely Oncogenic | frameshift_variant    | MSKCC          |
| TP53 | P190L        | Likely Oncogenic | missense_variant      | COH/UCD; MSKCC |
| TP53 | P190T        | Likely Oncogenic | missense_variant      | MSKCC          |
| TP53 | Q192*        | Likely Oncogenic | stop_gained           | COH/UCD; MSKCC |
| TP53 | H193R        | Likely Oncogenic | missense_variant      | COH/UCD; MSKCC |
| TP53 | H193Y        | Likely Oncogenic | missense_variant      | COH/UCD; MSKCC |
| TP53 | L194fs*13    | Likely Oncogenic | frameshift_variant    | COH/UCD        |
| TP53 | L194F        | Likely Oncogenic | missense_variant      | MSKCC          |
| TP53 | L194P        | Likely Oncogenic | missense_variant      | COH/UCD        |
| TP53 | L194R        | Likely Oncogenic | missense_variant      | COH/UCD        |
| TP53 | I195Nfs*14   | Likely Oncogenic | frameshift_variant    | MSKCC          |

Supplementary Table S1

|      |                   |                  |                       |                |
|------|-------------------|------------------|-----------------------|----------------|
| TP53 | I195N             | Likely Oncogenic | missense_variant      | MSKCC          |
| TP53 | I195T             | Likely Oncogenic | missense_variant      | COH/UCD        |
| TP53 | I195Yfs*14        | Likely Oncogenic | frameshift_variant    | MSKCC          |
| TP53 | R196*             | Likely Oncogenic | stop_gained           | COH/UCD; MSKCC |
| TP53 | V197M             | Likely Oncogenic | missense_variant      | MSKCC          |
| TP53 | E198*             | Likely Oncogenic | stop_gained           | MSKCC          |
| TP53 | G199_E204del      | Likely Oncogenic | inframe_deletion      | MSKCC          |
| TP53 | N200fs*47         | Likely Oncogenic | frameshift_variant    | COH/UCD        |
| TP53 | N200Kfs*48        | Likely Oncogenic | frameshift_variant    | MSKCC          |
| TP53 | L201Afs*7         | Likely Oncogenic | frameshift_variant    | MSKCC          |
| TP53 | V203M             | Likely Oncogenic | missense_variant      | COH/UCD        |
| TP53 | E204*             | Likely Oncogenic | stop_gained           | COH/UCD        |
| TP53 | Y205C             | Likely Oncogenic | missense_variant      | COH/UCD; MSKCC |
| TP53 | Y205D             | Likely Oncogenic | missense_variant      | COH/UCD        |
| TP53 | Y205S             | Likely Oncogenic | missense_variant      | MSKCC          |
| TP53 | W206R             | Likely Oncogenic | missense_variant      | COH/UCD        |
| TP53 | D208Ffs*42        | Likely Oncogenic | frameshift_variant    | MSKCC          |
| TP53 | R209Kfs*6         | Likely Oncogenic | frameshift_variant    | MSKCC          |
| TP53 | N210Rfs*14        | Likely Oncogenic | frameshift_variant    | MSKCC          |
| TP53 | N210Tfs*37        | Likely Oncogenic | frameshift_variant    | MSKCC          |
| TP53 | T211I             | Likely Oncogenic | missense_variant      | COH/UCD        |
| TP53 | F212Sfs*3         | Likely Oncogenic | frameshift_variant    | MSKCC          |
| TP53 | R213*             | Likely Oncogenic | stop_gained           | COH/UCD; MSKCC |
| TP53 | R213Dfs*34        | Likely Oncogenic | frameshift_variant    | MSKCC          |
| TP53 | R213L             | Likely Oncogenic | missense_variant      | COH/UCD; MSKCC |
| TP53 | R213Q             | Likely Oncogenic | missense_variant      | COH/UCD; MSKCC |
| TP53 | H214Qfs*7         | Likely Oncogenic | frameshift_variant    | MSKCC          |
| TP53 | H214R             | Likely Oncogenic | missense_variant      | MSKCC          |
| TP53 | S215G             | Oncogenic        | missense_variant      | MSKCC          |
| TP53 | S215I             | Likely Oncogenic | missense_variant      | COH/UCD; MSKCC |
| TP53 | S215N             | Likely Oncogenic | missense_variant      | MSKCC          |
| TP53 | S215R             | Likely Oncogenic | missense_variant      | MSKCC          |
| TP53 | V216L             | Likely Oncogenic | missense_variant      | COH/UCD        |
| TP53 | V216M             | Likely Oncogenic | missense_variant      | COH/UCD        |
| TP53 | V217Gfs*30        | Likely Oncogenic | frameshift_variant    | MSKCC          |
| TP53 | V217_V218insIVVVV | Likely Oncogenic | inframe_insertion     | MSKCC          |
| TP53 | Y220C             | Oncogenic        | missense_variant      | COH/UCD; MSKCC |
| TP53 | E221*             | Likely Oncogenic | stop_gained           | MSKCC          |
| TP53 | P223Lfs*24        | Likely Oncogenic | frameshift_variant    | MSKCC          |
| TP53 | E224D             | Likely Oncogenic | missense_variant      | COH/UCD        |
| TP53 | X224_splice       | Likely Oncogenic | splice_region_variant | COH/UCD; MSKCC |
| TP53 | X225_splice       | Likely Oncogenic | splice_region_variant | MSKCC          |
| TP53 | C229Yfs*10        | Likely Oncogenic | frameshift_variant    | MSKCC          |
| TP53 | C229_H233del      | Likely Oncogenic | inframe_deletion      | MSKCC          |
| TP53 | I232N             | Likely Oncogenic | missense_variant      | MSKCC          |
| TP53 | I232S             | Likely Oncogenic | missense_variant      | COH/UCD        |
| TP53 | I232T             | Likely Oncogenic | missense_variant      | COH/UCD        |
| TP53 | Y234C             | Likely Oncogenic | missense_variant      | COH/UCD; MSKCC |
| TP53 | Y234H             | Likely Oncogenic | missense_variant      | MSKCC          |
| TP53 | N235del           | Likely Oncogenic | inframe_deletion      | MSKCC          |
| TP53 | Y236*             | Likely Oncogenic | stop_gained           | MSKCC          |
| TP53 | Y236C             | Likely Oncogenic | missense_variant      | COH/UCD; MSKCC |
| TP53 | Y236D             | Likely Oncogenic | missense_variant      | MSKCC          |
| TP53 | Y236N             | Likely Oncogenic | missense_variant      | MSKCC          |
| TP53 | Y236_M237insTT    | Likely Oncogenic | inframe_insertion     | MSKCC          |
| TP53 | M237I             | Likely Oncogenic | missense_variant      | COH/UCD; MSKCC |
| TP53 | C238Y             | Likely Oncogenic | missense_variant      | MSKCC          |
| TP53 | C238_S240del      | Likely Oncogenic | inframe_deletion      | MSKCC          |
| TP53 | N239*             | Likely Oncogenic | stop_gained           | MSKCC          |
| TP53 | N239D             | Likely Oncogenic | missense_variant      | COH/UCD; MSKCC |
| TP53 | S241C             | Likely Oncogenic | missense_variant      | MSKCC          |
| TP53 | S241F             | Likely Oncogenic | missense_variant      | COH/UCD; MSKCC |
| TP53 | S241P             | Likely Oncogenic | missense_variant      | COH/UCD; MSKCC |
| TP53 | C242F             | Likely Oncogenic | missense_variant      | COH/UCD; MSKCC |
| TP53 | C242S             | Likely Oncogenic | missense_variant      | COH/UCD; MSKCC |
| TP53 | C242Y             | Likely Oncogenic | missense_variant      | MSKCC          |
| TP53 | G244C             | Likely Oncogenic | missense_variant      | COH/UCD        |
| TP53 | G244D             | Likely Oncogenic | missense_variant      | MSKCC          |
| TP53 | G244S             | Oncogenic        | missense_variant      | COH/UCD; MSKCC |
| TP53 | G244V             | Likely Oncogenic | missense_variant      | COH/UCD        |
| TP53 | G245A             | Likely Oncogenic | missense_variant      | COH/UCD        |
| TP53 | G245C             | Likely Oncogenic | missense_variant      | COH/UCD; MSKCC |
| TP53 | G245D             | Likely Oncogenic | missense_variant      | COH/UCD; MSKCC |
| TP53 | G245S             | Oncogenic        | missense_variant      | COH/UCD; MSKCC |
| TP53 | G245V             | Likely Oncogenic | missense_variant      | MSKCC          |
| TP53 | M246K             | Likely Oncogenic | missense_variant      | COH/UCD        |
| TP53 | M246V             | Likely Oncogenic | missense_variant      | MSKCC          |
| TP53 | N247I             | Likely Oncogenic | missense_variant      | COH/UCD        |
| TP53 | N247Y             | Likely Oncogenic | missense_variant      | COH/UCD        |

Supplementary Table S1

|      |                |                  |                       |                |
|------|----------------|------------------|-----------------------|----------------|
| TP53 | R248Q          | Likely Oncogenic | missense_variant      | COH/UCD; MSKCC |
| TP53 | R248W          | Likely Oncogenic | missense_variant      | COH/UCD; MSKCC |
| TP53 | R249M          | Likely Oncogenic | missense_variant      | COH/UCD; MSKCC |
| TP53 | R249S          | Likely Oncogenic | missense_variant      | COH/UCD; MSKCC |
| TP53 | R249W          | Oncogenic        | missense_variant      | MSKCC          |
| TP53 | P250L          | Likely Oncogenic | missense_variant      | MSKCC          |
| TP53 | I251fs*97      | Likely Oncogenic | frameshift_variant    | COH/UCD        |
| TP53 | L252_T253insS  | Likely Oncogenic | inframe_insertion     | MSKCC          |
| TP53 | T253Nfs*11     | Likely Oncogenic | frameshift_variant    | MSKCC          |
| TP53 | I254del        | Likely Oncogenic | inframe_deletion      | COH/UCD        |
| TP53 | I254N          | Likely Oncogenic | missense_variant      | MSKCC          |
| TP53 | I255del        | Likely Oncogenic | inframe_deletion      | MSKCC          |
| TP53 | I255N          | Likely Oncogenic | missense_variant      | MSKCC          |
| TP53 | I255_T256insS  | Likely Oncogenic | inframe_insertion     | MSKCC          |
| TP53 | L257P          | Likely Oncogenic | missense_variant      | MSKCC          |
| TP53 | L257Q          | Likely Oncogenic | missense_variant      | MSKCC          |
| TP53 | L257Rfs*6      | Likely Oncogenic | frameshift_variant    | MSKCC          |
| TP53 | L257R          | Likely Oncogenic | missense_variant      | MSKCC          |
| TP53 | E258fs*87      | Likely Oncogenic | frameshift_variant    | COH/UCD        |
| TP53 | E258*          | Likely Oncogenic | stop_gained           | MSKCC          |
| TP53 | E258D          | Likely Oncogenic | missense_variant      | COH/UCD        |
| TP53 | E258G          | Likely Oncogenic | missense_variant      | MSKCC          |
| TP53 | E258K          | Likely Oncogenic | missense_variant      | COH/UCD        |
| TP53 | X258_splice    | Likely Oncogenic | splice_region_variant | MSKCC          |
| TP53 | D259H          | Likely Oncogenic | missense_variant      | MSKCC          |
| TP53 | D259Y          | Likely Oncogenic | missense_variant      | COH/UCD; MSKCC |
| TP53 | X261_splice    | Likely Oncogenic | splice_region_variant | COH/UCD; MSKCC |
| TP53 | G262V          | Likely Oncogenic | missense_variant      | MSKCC          |
| TP53 | L264del        | Likely Oncogenic | inframe_deletion      | COH/UCD        |
| TP53 | L265P          | Likely Oncogenic | missense_variant      | COH/UCD; MSKCC |
| TP53 | L265R          | Likely Oncogenic | missense_variant      | MSKCC          |
| TP53 | G266E          | Likely Oncogenic | missense_variant      | COH/UCD; MSKCC |
| TP53 | G266R          | Likely Oncogenic | missense_variant      | COH/UCD; MSKCC |
| TP53 | R267Q          | Likely Oncogenic | missense_variant      | MSKCC          |
| TP53 | R267W          | Likely Oncogenic | missense_variant      | MSKCC          |
| TP53 | N268fs*4       | Likely Oncogenic | frameshift_variant    | COH/UCD        |
| TP53 | N268K          | Likely Oncogenic | missense_variant      | COH/UCD        |
| TP53 | S269_E271del   | Likely Oncogenic | inframe_deletion      | MSKCC          |
| TP53 | F270C          | Likely Oncogenic | missense_variant      | MSKCC          |
| TP53 | F270L          | Likely Oncogenic | missense_variant      | COH/UCD        |
| TP53 | E271*          | Likely Oncogenic | stop_gained           | MSKCC          |
| TP53 | E271V          | Likely Oncogenic | missense_variant      | COH/UCD        |
| TP53 | V272E          | Likely Oncogenic | missense_variant      | MSKCC          |
| TP53 | V272L          | Likely Oncogenic | missense_variant      | COH/UCD; MSKCC |
| TP53 | V272M          | Likely Oncogenic | missense_variant      | COH/UCD; MSKCC |
| TP53 | R273C          | Likely Oncogenic | missense_variant      | COH/UCD; MSKCC |
| TP53 | R273H          | Oncogenic        | missense_variant      | COH/UCD; MSKCC |
| TP53 | R273L          | Likely Oncogenic | missense_variant      | MSKCC          |
| TP53 | R273P          | Likely Oncogenic | missense_variant      | MSKCC          |
| TP53 | C275*          | Likely Oncogenic | stop_gained           | COH/UCD        |
| TP53 | C275F          | Likely Oncogenic | missense_variant      | MSKCC          |
| TP53 | C275Lfs*31     | Likely Oncogenic | frameshift_variant    | MSKCC          |
| TP53 | C275Y          | Likely Oncogenic | missense_variant      | COH/UCD        |
| TP53 | C275_A276insFV | Likely Oncogenic | inframe_insertion     | MSKCC          |
| TP53 | C277*          | Likely Oncogenic | stop_gained           | MSKCC          |
| TP53 | P278R          | Likely Oncogenic | missense_variant      | MSKCC          |
| TP53 | P278S          | Likely Oncogenic | missense_variant      | MSKCC          |
| TP53 | P278T          | Likely Oncogenic | missense_variant      | COH/UCD; MSKCC |
| TP53 | R280Efs*65     | Likely Oncogenic | frameshift_variant    | MSKCC          |
| TP53 | R280G          | Likely Oncogenic | missense_variant      | MSKCC          |
| TP53 | R282W          | Likely Oncogenic | missense_variant      | COH/UCD; MSKCC |
| TP53 | R283fs*63      | Likely Oncogenic | frameshift_variant    | COH/UCD        |
| TP53 | R283C          | Likely Oncogenic | missense_variant      | COH/UCD; MSKCC |
| TP53 | R283P          | Likely Oncogenic | missense_variant      | COH/UCD        |
| TP53 | E285K          | Likely Oncogenic | missense_variant      | COH/UCD; MSKCC |
| TP53 | E286K          | Likely Oncogenic | missense_variant      | COH/UCD; MSKCC |
| TP53 | E286V          | Likely Oncogenic | missense_variant      | MSKCC          |
| TP53 | E287*          | Likely Oncogenic | stop_gained           | MSKCC          |
| TP53 | N288lfs*57     | Likely Oncogenic | frameshift_variant    | MSKCC          |
| TP53 | N288Tfs*55     | Likely Oncogenic | frameshift_variant    | MSKCC          |
| TP53 | R290H          | Likely Oncogenic | missense_variant      | MSKCC          |
| TP53 | K292*          | Likely Oncogenic | stop_gained           | MSKCC          |
| TP53 | G293Rfs*13     | Likely Oncogenic | frameshift_variant    | MSKCC          |
| TP53 | E294*          | Likely Oncogenic | stop_gained           | COH/UCD; MSKCC |
| TP53 | E294Sfs*51     | Likely Oncogenic | frameshift_variant    | MSKCC          |
| TP53 | T304Rfs*44     | Likely Oncogenic | frameshift_variant    | MSKCC          |
| TP53 | R306*          | Likely Oncogenic | stop_gained           | COH/UCD; MSKCC |
| TP53 | X307_splice    | Likely Oncogenic | splice_region_variant | COH/UCD; MSKCC |
| TP53 | N310fs*36      | Likely Oncogenic | frameshift_variant    | COH/UCD        |

Supplementary Table S1

|        |                     |                  |                       |                |
|--------|---------------------|------------------|-----------------------|----------------|
| TP53   | S315Lfs*30          | Likely Oncogenic | frameshift_variant    | MSKCC          |
| TP53   | Q317*               | Likely Oncogenic | stop_gained           | MSKCC          |
| TP53   | K320*               | Likely Oncogenic | stop_gained           | COH/UCD        |
| TP53   | P322Hfs*23          | Likely Oncogenic | frameshift_variant    | MSKCC          |
| TP53   | Q331*               | Likely Oncogenic | stop_gained           | MSKCC          |
| TP53   | X331_splice         | Likely Oncogenic | splice_region_variant | COH/UCD; MSKCC |
| TP53   | X332_splice         | Likely Oncogenic | splice_region_variant | MSKCC          |
| TP53   | R333Vfs*12          | Likely Oncogenic | frameshift_variant    | MSKCC          |
| TP53   | R335Pfs*2           | Likely Oncogenic | frameshift_variant    | MSKCC          |
| TP53   | E336fs*10           | Likely Oncogenic | frameshift_variant    | COH/UCD        |
| TP53   | R337fs*10           | Likely Oncogenic | frameshift_variant    | COH/UCD        |
| TP53   | R337C               | Likely Oncogenic | missense_variant      | COH/UCD; MSKCC |
| TP53   | R337L               | Likely Oncogenic | missense_variant      | MSKCC          |
| TP53   | R342*               | Likely Oncogenic | stop_gained           | COH/UCD; MSKCC |
| TP53   | R342Efs*3           | Likely Oncogenic | frameshift_variant    | MSKCC          |
| TP53   | R342Qfs*3           | Likely Oncogenic | frameshift_variant    | MSKCC          |
| TP53   | A347D               | Likely Oncogenic | missense_variant      | MSKCC          |
| TP53   | L350Afs*3           | Likely Oncogenic | frameshift_variant    | MSKCC          |
| TP53   | H380Ifs*42          | Likely Oncogenic | frameshift_variant    | MSKCC          |
| TP53   | K382fs*13+          | Likely Oncogenic | frameshift_variant    | COH/UCD        |
| TP53   | K382Nfs*40          | Likely Oncogenic | frameshift_variant    | MSKCC          |
| TP53   | P390Lfs*79          | Likely Oncogenic | frameshift_variant    | MSKCC          |
| TP53   | *394Rext*9          | Unknown          | stop_loss             | MSKCC          |
| TP53   | HOMDEL              | Likely Oncogenic | gene_loss             | COH/UCD; MSKCC |
| TP53   | rearrangement       | Unknown          | rearrangement         | COH/UCD        |
| TP53   | MUTATED             | Unknown          | mutated               | MSKCC          |
| TP53   | loss exons 2-11     | Likely Oncogenic | exon_loss             | COH/UCD        |
| TP53   | loss exons 7-11     | Likely Oncogenic | exon_loss             | COH/UCD        |
| TP53   | intron 9 truncation | Likely Oncogenic | truncation            | COH/UCD        |
| ARID1A | P21del              | Unknown          | inframe_deletion      | COH/UCD        |
| ARID1A | A45del              | Unknown          | inframe_deletion      | MSKCC          |
| ARID1A | A53T                | Unknown          | missense_variant      | MSKCC          |
| ARID1A | G95D                | Unknown          | missense_variant      | COH/UCD        |
| ARID1A | R110Yfs*6           | Likely Oncogenic | frameshift_variant    | MSKCC          |
| ARID1A | S128T               | Unknown          | missense_variant      | COH/UCD        |
| ARID1A | P223H               | Unknown          | missense_variant      | COH/UCD        |
| ARID1A | P225Afs*175         | Likely Oncogenic | frameshift_variant    | MSKCC          |
| ARID1A | A246_A247insA       | Unknown          | inframe_insertion     | COH/UCD        |
| ARID1A | G276*               | Likely Oncogenic | stop_gained           | MSKCC          |
| ARID1A | T294fs*69           | Likely Oncogenic | frameshift_variant    | COH/UCD        |
| ARID1A | D315Rfs*85          | Likely Oncogenic | frameshift_variant    | MSKCC          |
| ARID1A | A339Lfs*24          | Likely Oncogenic | frameshift_variant    | MSKCC          |
| ARID1A | H358Y               | Unknown          | missense_variant      | COH/UCD        |
| ARID1A | Q372fs*19           | Likely Oncogenic | frameshift_variant    | COH/UCD        |
| ARID1A | P418fs*15           | Likely Oncogenic | frameshift_variant    | COH/UCD        |
| ARID1A | P568Gfs*52          | Likely Oncogenic | frameshift_variant    | MSKCC          |
| ARID1A | S621fs*1            | Likely Oncogenic | frameshift_variant    | COH/UCD        |
| ARID1A | S645*               | Likely Oncogenic | stop_gained           | MSKCC          |
| ARID1A | M651Hfs*25          | Likely Oncogenic | frameshift_variant    | MSKCC          |
| ARID1A | Q758fs*59           | Likely Oncogenic | frameshift_variant    | COH/UCD        |
| ARID1A | Q802fs*15           | Likely Oncogenic | frameshift_variant    | COH/UCD        |
| ARID1A | S825Vfs*8           | Likely Oncogenic | frameshift_variant    | MSKCC          |
| ARID1A | Q840*               | Likely Oncogenic | stop_gained           | MSKCC          |
| ARID1A | S862Lfs*10          | Likely Oncogenic | frameshift_variant    | MSKCC          |
| ARID1A | P870Qfs*62          | Likely Oncogenic | frameshift_variant    | MSKCC          |
| ARID1A | G889D               | Unknown          | missense_variant      | MSKCC          |
| ARID1A | N906S               | Unknown          | missense_variant      | COH/UCD        |
| ARID1A | N935S               | Unknown          | missense_variant      | COH/UCD        |
| ARID1A | Y948*               | Likely Oncogenic | stop_gained           | MSKCC          |
| ARID1A | X1067_splice        | Likely Oncogenic | splice_region_variant | MSKCC          |
| ARID1A | S1182fs*24          | Likely Oncogenic | frameshift_variant    | COH/UCD        |
| ARID1A | M1220T              | Unknown          | missense_variant      | MSKCC          |
| ARID1A | D1258*              | Likely Oncogenic | stop_gained           | MSKCC          |
| ARID1A | R1276*              | Likely Oncogenic | stop_gained           | MSKCC          |
| ARID1A | R1276Ifs*10         | Likely Oncogenic | frameshift_variant    | MSKCC          |
| ARID1A | P1326fs*155         | Likely Oncogenic | frameshift_variant    | COH/UCD        |
| ARID1A | Q1331*              | Likely Oncogenic | stop_gained           | COH/UCD        |
| ARID1A | Q1332*              | Likely Oncogenic | stop_gained           | COH/UCD        |
| ARID1A | R1335*              | Likely Oncogenic | stop_gained           | COH/UCD; MSKCC |
| ARID1A | F1343L              | Unknown          | missense_variant      | COH/UCD        |
| ARID1A | R1371W              | Unknown          | missense_variant      | MSKCC          |
| ARID1A | E1385*              | Likely Oncogenic | stop_gained           | COH/UCD        |
| ARID1A | Q1420*              | Likely Oncogenic | stop_gained           | MSKCC          |
| ARID1A | N1433_A1437del      | Unknown          | inframe_deletion      | MSKCC          |
| ARID1A | G1450S              | Unknown          | missense_variant      | COH/UCD        |
| ARID1A | R1461*              | Likely Oncogenic | stop_gained           | MSKCC          |
| ARID1A | Q1473fs*17          | Likely Oncogenic | frameshift_variant    | COH/UCD        |
| ARID1A | Q1493*              | Likely Oncogenic | stop_gained           | MSKCC          |
| ARID1A | M1595L              | Unknown          | missense_variant      | COH/UCD        |

Supplementary Table S1

|        |                      |                     |                       |                |
|--------|----------------------|---------------------|-----------------------|----------------|
| ARID1A | E1733fs*3            | Likely Oncogenic    | frameshift_variant    | COH/UCD        |
| ARID1A | L1745Wfs*25          | Likely Oncogenic    | frameshift_variant    | MSKCC          |
| ARID1A | S1751fs*5            | Likely Oncogenic    | frameshift_variant    | COH/UCD        |
| ARID1A | L1769Rfs*3           | Likely Oncogenic    | frameshift_variant    | MSKCC          |
| ARID1A | E1787*               | Likely Oncogenic    | stop_gained           | MSKCC          |
| ARID1A | N1820S               | Unknown             | missense_variant      | MSKCC          |
| ARID1A | G1848Wfs*6           | Likely Oncogenic    | frameshift_variant    | MSKCC          |
| ARID1A | D1850fs*4            | Likely Oncogenic    | frameshift_variant    | COH/UCD        |
| ARID1A | D1850fs*33           | Likely Oncogenic    | frameshift_variant    | COH/UCD        |
| ARID1A | Q1856*               | Likely Oncogenic    | stop_gained           | MSKCC          |
| ARID1A | R1869W               | Unknown             | missense_variant      | COH/UCD        |
| ARID1A | Q1947*               | Likely Oncogenic    | stop_gained           | MSKCC          |
| ARID1A | P1959S               | Unknown             | missense_variant      | COH/UCD        |
| ARID1A | V1982I               | Unknown             | missense_variant      | COH/UCD        |
| ARID1A | S1985fs*30           | Likely Oncogenic    | frameshift_variant    | COH/UCD        |
| ARID1A | N1986D               | Unknown             | missense_variant      | COH/UCD        |
| ARID1A | R1989*               | Likely Oncogenic    | stop_gained           | MSKCC          |
| ARID1A | K2003Pfs*28          | Likely Oncogenic    | frameshift_variant    | MSKCC          |
| ARID1A | G2087R               | Predicted Oncogenic | missense_variant      | MSKCC          |
| ARID1A | W2091*               | Likely Oncogenic    | stop_gained           | MSKCC          |
| ARID1A | C2094F               | Unknown             | missense_variant      | MSKCC          |
| ARID1A | N2109S               | Unknown             | missense_variant      | COH/UCD        |
| ARID1A | F2141fs*59           | Likely Oncogenic    | frameshift_variant    | COH/UCD        |
| ARID1A | R2158*               | Likely Oncogenic    | stop_gained           | MSKCC          |
| ARID1A | N2220S               | Unknown             | missense_variant      | COH/UCD        |
| ARID1A | HOMDEL               | Likely Oncogenic    | gene_loss             | COH/UCD        |
| ARID1A | truncation intron 13 | Likely Oncogenic    | truncation            | COH/UCD        |
| CTNNB1 | X5_splice            | Unknown             | splice_region_variant | MSKCC          |
| CTNNB1 | X6_splice            | Unknown             | splice_region_variant | MSKCC          |
| CTNNB1 | X10_splice           | Unknown             | splice_region_variant | MSKCC          |
| CTNNB1 | M12_+140delinsI      | Unknown             | missense_variant      | MSKCC          |
| CTNNB1 | X13_splice           | Unknown             | splice_region_variant | MSKCC          |
| CTNNB1 | K19_E77del           | Likely Oncogenic    | inframe_deletion      | COH/UCD        |
| CTNNB1 | V22_T40del           | Predicted Oncogenic | inframe_deletion      | COH/UCD        |
| CTNNB1 | V22_S33del           | Predicted Oncogenic | inframe_deletion      | MSKCC          |
| CTNNB1 | S23_G34del           | Predicted Oncogenic | inframe_deletion      | COH/UCD        |
| CTNNB1 | S23_S33del           | Predicted Oncogenic | inframe_deletion      | MSKCC          |
| CTNNB1 | W25_D32del           | Predicted Oncogenic | inframe_deletion      | MSKCC          |
| CTNNB1 | X29_splice           | Unknown             | splice_region_variant | MSKCC          |
| CTNNB1 | D32H                 | Likely Oncogenic    | missense_variant      | MSKCC          |
| CTNNB1 | S33F                 | Likely Oncogenic    | missense_variant      | MSKCC          |
| CTNNB1 | S37Y                 | Likely Oncogenic    | missense_variant      | COH/UCD        |
| CTNNB1 | S45del               | Likely Oncogenic    | inframe_deletion      | COH/UCD        |
| CTNNB1 | S45F                 | Likely Oncogenic    | missense_variant      | COH/UCD; MSKCC |
| CTNNB1 | S45P                 | Likely Oncogenic    | missense_variant      | COH/UCD        |
| CTNNB1 | S71fs*11             | Unknown             | frameshift_variant    | COH/UCD        |
| CTNNB1 | X81_splice           | Unknown             | splice_region_variant | MSKCC          |
| CTNNB1 | Q108H                | Unknown             | missense_variant      | COH/UCD        |
| CTNNB1 | A116V                | Unknown             | missense_variant      | COH/UCD        |
| CTNNB1 | Q123*                | Unknown             | stop_gained           | MSKCC          |
| CTNNB1 | A152T                | Unknown             | missense_variant      | COH/UCD        |
| CTNNB1 | L159P                | Unknown             | missense_variant      | MSKCC          |
| CTNNB1 | T257I                | Unknown             | missense_variant      | COH/UCD        |
| CTNNB1 | K270_V273del         | Unknown             | inframe_deletion      | MSKCC          |
| CTNNB1 | F293Y                | Unknown             | missense_variant      | COH/UCD        |
| CTNNB1 | I303F                | Unknown             | missense_variant      | COH/UCD        |
| CTNNB1 | E334K                | Unknown             | missense_variant      | COH/UCD        |
| CTNNB1 | K335I                | Likely Oncogenic    | missense_variant      | COH/UCD; MSKCC |
| CTNNB1 | W383R                | Likely Oncogenic    | missense_variant      | MSKCC          |
| CTNNB1 | D412H                | Unknown             | missense_variant      | MSKCC          |
| CTNNB1 | G422V                | Unknown             | missense_variant      | MSKCC          |
| CTNNB1 | S425fs*11            | Unknown             | frameshift_variant    | COH/UCD        |
| CTNNB1 | R469C                | Unknown             | missense_variant      | MSKCC          |
| CTNNB1 | Q545K                | Unknown             | missense_variant      | MSKCC          |
| CTNNB1 | E567K                | Unknown             | missense_variant      | MSKCC          |
| CTNNB1 | R582W                | Unknown             | missense_variant      | MSKCC          |
| CTNNB1 | R587Q                | Unknown             | missense_variant      | COH/UCD        |
| CTNNB1 | A615E                | Unknown             | missense_variant      | MSKCC          |
| CTNNB1 | A622del              | Unknown             | inframe_deletion      | COH/UCD        |
| CTNNB1 | R661Q                | Unknown             | missense_variant      | MSKCC          |
| CTNNB1 | A728T                | Unknown             | missense_variant      | MSKCC          |
| CTNNB1 | M739I                | Unknown             | missense_variant      | COH/UCD        |
| CTNNB1 | Q773*                | Unknown             | stop_gained           | MSKCC          |
| CTNNB1 | AMP                  | Unknown             | amplification         | MSKCC          |
| CTNNB1 | HOMDEL               | Unknown             | gene_loss             | MSKCC          |
| CTNNB1 | CTNNB1-intragenic    | Unknown             | rearrangement         | MSKCC          |
| CTNNB1 | deletion exons 3-4   | Unknown             | exon_loss             | COH/UCD        |
| FBXW7  | S7F                  | Unknown             | missense_variant      | MSKCC          |
| FBXW7  | R14*                 | Likely Oncogenic    | stop_gained           | COH/UCD        |

Supplementary Table S1



|       |             |                     |                       |                |
|-------|-------------|---------------------|-----------------------|----------------|
| FBXW7 | T15_G16insL | Likely Neutral      | inframe_insertion     | MSKCC          |
| FBXW7 | N22S        | Unknown             | missense_variant      | COH/UCD        |
| FBXW7 | E51*        | Likely Oncogenic    | stop_gained           | MSKCC          |
| FBXW7 | F77S        | Unknown             | missense_variant      | COH/UCD        |
| FBXW7 | Y86fs*12    | Likely Oncogenic    | frameshift_variant    | COH/UCD        |
| FBXW7 | E117*       | Likely Oncogenic    | stop_gained           | MSKCC          |
| FBXW7 | M118Efs*8   | Likely Oncogenic    | frameshift_variant    | MSKCC          |
| FBXW7 | G184*       | Likely Oncogenic    | stop_gained           | MSKCC          |
| FBXW7 | E192A       | Unknown             | missense_variant      | COH/UCD        |
| FBXW7 | X195_splice | Likely Oncogenic    | splice_region_variant | MSKCC          |
| FBXW7 | Q218*       | Likely Oncogenic    | stop_gained           | MSKCC          |
| FBXW7 | R224*       | Likely Oncogenic    | stop_gained           | MSKCC          |
| FBXW7 | R278*       | Likely Oncogenic    | stop_gained           | COH/UCD; MSKCC |
| FBXW7 | S282*       | Likely Oncogenic    | stop_gained           | MSKCC          |
| FBXW7 | E287D       | Predicted Oncogenic | missense_variant      | MSKCC          |
| FBXW7 | X287_splice | Likely Oncogenic    | splice_region_variant | COH/UCD; MSKCC |
| FBXW7 | Y291Lfs*26  | Likely Oncogenic    | frameshift_variant    | MSKCC          |
| FBXW7 | V292A       | Unknown             | missense_variant      | COH/UCD        |
| FBXW7 | E316*       | Likely Oncogenic    | stop_gained           | MSKCC          |
| FBXW7 | X329_splice | Likely Oncogenic    | splice_region_variant | MSKCC          |
| FBXW7 | R360K       | Unknown             | missense_variant      | COH/UCD        |
| FBXW7 | W365*       | Likely Oncogenic    | stop_gained           | MSKCC          |
| FBXW7 | R367*       | Likely Oncogenic    | stop_gained           | MSKCC          |
| FBXW7 | X374_splice | Likely Oncogenic    | splice_region_variant | MSKCC          |
| FBXW7 | H382del     | Unknown             | inframe_deletion      | MSKCC          |
| FBXW7 | R393*       | Likely Oncogenic    | stop_gained           | COH/UCD        |
| FBXW7 | G397D       | Unknown             | missense_variant      | MSKCC          |
| FBXW7 | N401del     | Unknown             | inframe_deletion      | MSKCC          |
| FBXW7 | X412_splice | Likely Oncogenic    | splice_region_variant | COH/UCD; MSKCC |
| FBXW7 | X413_splice | Likely Oncogenic    | splice_region_variant | MSKCC          |
| FBXW7 | H420D       | Unknown             | missense_variant      | MSKCC          |
| FBXW7 | G423V       | Likely Oncogenic    | missense_variant      | MSKCC          |
| FBXW7 | G437V       | Predicted Oncogenic | missense_variant      | MSKCC          |
| FBXW7 | R465C       | Oncogenic           | missense_variant      | COH/UCD; MSKCC |
| FBXW7 | R465H       | Likely Oncogenic    | missense_variant      | COH/UCD; MSKCC |
| FBXW7 | R465S       | Likely Oncogenic    | missense_variant      | MSKCC          |
| FBXW7 | R473Kfs*4   | Likely Oncogenic    | frameshift_variant    | MSKCC          |
| FBXW7 | G477S       | Unknown             | missense_variant      | COH/UCD        |
| FBXW7 | S478F       | Unknown             | missense_variant      | MSKCC          |
| FBXW7 | R479*       | Likely Oncogenic    | stop_gained           | MSKCC          |
| FBXW7 | R479P       | Likely Oncogenic    | missense_variant      | MSKCC          |
| FBXW7 | R479Q       | Oncogenic           | missense_variant      | COH/UCD; MSKCC |
| FBXW7 | L497S       | Unknown             | missense_variant      | MSKCC          |
| FBXW7 | A503V       | Likely Neutral      | missense_variant      | COH/UCD        |
| FBXW7 | R505C       | Oncogenic           | missense_variant      | COH/UCD; MSKCC |
| FBXW7 | R505G       | Likely Oncogenic    | missense_variant      | COH/UCD        |
| FBXW7 | R505L       | Oncogenic           | missense_variant      | COH/UCD        |
| FBXW7 | A518T       | Unknown             | missense_variant      | MSKCC          |
| FBXW7 | Y519D       | Unknown             | missense_variant      | COH/UCD        |
| FBXW7 | D520G       | Likely Oncogenic    | missense_variant      | MSKCC          |
| FBXW7 | D520N       | Likely Oncogenic    | missense_variant      | MSKCC          |
| FBXW7 | Y545C       | Likely Oncogenic    | missense_variant      | COH/UCD; MSKCC |
| FBXW7 | G557V       | Unknown             | missense_variant      | COH/UCD        |
| FBXW7 | I563V       | Unknown             | missense_variant      | MSKCC          |
| FBXW7 | R564C       | Unknown             | missense_variant      | MSKCC          |
| FBXW7 | H580R       | Unknown             | missense_variant      | MSKCC          |
| FBXW7 | H580Y       | Unknown             | missense_variant      | COH/UCD        |
| FBXW7 | S582L       | Predicted Oncogenic | missense_variant      | COH/UCD; MSKCC |
| FBXW7 | S582P       | Predicted Oncogenic | missense_variant      | MSKCC          |
| FBXW7 | D591fs*37   | Likely Oncogenic    | frameshift_variant    | COH/UCD        |
| FBXW7 | L594F       | Unknown             | missense_variant      | MSKCC          |
| FBXW7 | S596F       | Unknown             | missense_variant      | MSKCC          |
| FBXW7 | N598H       | Unknown             | missense_variant      | MSKCC          |
| FBXW7 | D600E       | Unknown             | missense_variant      | COH/UCD; MSKCC |
| FBXW7 | D600N       | Unknown             | missense_variant      | MSKCC          |
| FBXW7 | H623Y       | Unknown             | missense_variant      | MSKCC          |
| FBXW7 | T653M       | Unknown             | missense_variant      | COH/UCD        |
| FBXW7 | R658*       | Likely Oncogenic    | stop_gained           | COH/UCD; MSKCC |
| FBXW7 | E664*       | Likely Oncogenic    | stop_gained           | COH/UCD        |
| FBXW7 | W673*       | Likely Oncogenic    | stop_gained           | MSKCC          |
| FBXW7 | W673S       | Unknown             | missense_variant      | MSKCC          |
| FBXW7 | R674Q       | Unknown             | missense_variant      | MSKCC          |
| FBXW7 | A677V       | Unknown             | missense_variant      | COH/UCD        |
| FBXW7 | R689W       | Likely Oncogenic    | missense_variant      | MSKCC          |
| FBXW7 | HOMDEL      | Unknown             | gene_loss             | MSKCC          |
| RNF43 | M1V         | Likely Oncogenic    | start_loss            | COH/UCD        |
| RNF43 | W15*        | Likely Oncogenic    | stop_gained           | COH/UCD        |
| RNF43 | R27H        | Unknown             | missense_variant      | COH/UCD        |
| RNF43 | V31Gfs*9    | Likely Oncogenic    | frameshift_variant    | MSKCC          |

Supplementary Table S1

|       |                    |                     |                       |                |
|-------|--------------------|---------------------|-----------------------|----------------|
| RNF43 | A46V               | Unknown             | missense_variant      | MSKCC          |
| RNF43 | V50Efs*31          | Likely Oncogenic    | frameshift_variant    | MSKCC          |
| RNF43 | N62D               | Unknown             | missense_variant      | MSKCC          |
| RNF43 | A73F               | Unknown             | missense_variant      | MSKCC          |
| RNF43 | Q84*               | Likely Oncogenic    | stop_gained           | MSKCC          |
| RNF43 | X84_splice         | Likely Oncogenic    | splice_region_variant | MSKCC          |
| RNF43 | F103Cfs*19         | Likely Oncogenic    | frameshift_variant    | MSKCC          |
| RNF43 | R113*              | Likely Oncogenic    | stop_gained           | MSKCC          |
| RNF43 | A115Rfs*11         | Likely Oncogenic    | frameshift_variant    | MSKCC          |
| RNF43 | R117fs*8           | Likely Oncogenic    | frameshift_variant    | COH/UCD        |
| RNF43 | A126V              | Unknown             | missense_variant      | COH/UCD        |
| RNF43 | R132*              | Likely Oncogenic    | stop_gained           | COH/UCD; MSKCC |
| RNF43 | R145*              | Likely Oncogenic    | stop_gained           | COH/UCD; MSKCC |
| RNF43 | R145Q              | Unknown             | missense_variant      | COH/UCD        |
| RNF43 | V161fs*6           | Likely Oncogenic    | frameshift_variant    | COH/UCD        |
| RNF43 | R185fs*3           | Likely Oncogenic    | frameshift_variant    | COH/UCD        |
| RNF43 | A193Gfs*6          | Likely Oncogenic    | frameshift_variant    | MSKCC          |
| RNF43 | Y197*              | Likely Oncogenic    | stop_gained           | MSKCC          |
| RNF43 | W200Sfs*60         | Likely Oncogenic    | frameshift_variant    | MSKCC          |
| RNF43 | F210Lfs*2          | Likely Oncogenic    | frameshift_variant    | MSKCC          |
| RNF43 | P229S              | Unknown             | missense_variant      | COH/UCD        |
| RNF43 | A244Pfs*175        | Likely Oncogenic    | frameshift_variant    | MSKCC          |
| RNF43 | A255fs*4           | Likely Oncogenic    | frameshift_variant    | COH/UCD        |
| RNF43 | R286Q              | Unknown             | missense_variant      | MSKCC          |
| RNF43 | C290F              | Unknown             | missense_variant      | MSKCC          |
| RNF43 | R296H              | Unknown             | missense_variant      | MSKCC          |
| RNF43 | D300A              | Unknown             | missense_variant      | MSKCC          |
| RNF43 | D300G              | Unknown             | missense_variant      | COH/UCD        |
| RNF43 | D300Gfs*120        | Likely Oncogenic    | frameshift_variant    | MSKCC          |
| RNF43 | R307W              | Unknown             | missense_variant      | COH/UCD        |
| RNF43 | S323fs*120         | Likely Oncogenic    | frameshift_variant    | COH/UCD        |
| RNF43 | A356Cfs*87         | Likely Oncogenic    | frameshift_variant    | MSKCC          |
| RNF43 | P361Lfs*58         | Likely Oncogenic    | frameshift_variant    | MSKCC          |
| RNF43 | P370Hfs*49         | Likely Oncogenic    | frameshift_variant    | MSKCC          |
| RNF43 | H388Y              | Unknown             | missense_variant      | COH/UCD        |
| RNF43 | H427Y              | Unknown             | missense_variant      | MSKCC          |
| RNF43 | R436C              | Unknown             | missense_variant      | MSKCC          |
| RNF43 | P441fs*61          | Likely Oncogenic    | frameshift_variant    | COH/UCD        |
| RNF43 | P441Lfs*61         | Likely Oncogenic    | frameshift_variant    | MSKCC          |
| RNF43 | E453*              | Likely Oncogenic    | stop_gained           | MSKCC          |
| RNF43 | V479fs*25          | Likely Oncogenic    | frameshift_variant    | COH/UCD        |
| RNF43 | P569S              | Unknown             | missense_variant      | COH/UCD        |
| RNF43 | E572D              | Unknown             | missense_variant      | COH/UCD        |
| RNF43 | R609W              | Unknown             | missense_variant      | MSKCC          |
| RNF43 | V627A              | Unknown             | missense_variant      | COH/UCD        |
| RNF43 | G659fs*41          | Likely Oncogenic    | frameshift_variant    | COH/UCD        |
| RNF43 | P660fs*41          | Likely Oncogenic    | frameshift_variant    | COH/UCD        |
| RNF43 | P660fs*87          | Likely Oncogenic    | frameshift_variant    | COH/UCD        |
| RNF43 | P660Sfs*87         | Likely Oncogenic    | frameshift_variant    | MSKCC          |
| RNF43 | R668Q              | Unknown             | missense_variant      | MSKCC          |
| RNF43 | K708R              | Unknown             | missense_variant      | MSKCC          |
| RNF43 | AMP                | Unknown             | amplification         | COH/UCD; MSKCC |
| RNF43 | HOMDEL             | Unknown             | gene_loss             | MSKCC          |
| RNF43 | MTMR4-RNF43 fusion | Likely Oncogenic    | rearrangement         | MSKCC          |
| SOX9  | D12fs*240          | Likely Oncogenic    | frameshift_variant    | COH/UCD        |
| SOX9  | E28*               | Likely Oncogenic    | stop_gained           | MSKCC          |
| SOX9  | S33Lfs*219         | Likely Oncogenic    | frameshift_variant    | MSKCC          |
| SOX9  | S39C               | Unknown             | missense_variant      | MSKCC          |
| SOX9  | K55fs*197          | Likely Oncogenic    | frameshift_variant    | COH/UCD        |
| SOX9  | E57Gfs*50          | Likely Oncogenic    | frameshift_variant    | MSKCC          |
| SOX9  | K61Efs*191         | Likely Oncogenic    | frameshift_variant    | MSKCC          |
| SOX9  | P70L               | Likely Oncogenic    | missense_variant      | COH/UCD        |
| SOX9  | C72Afs*27          | Likely Oncogenic    | frameshift_variant    | MSKCC          |
| SOX9  | I73N               | Unknown             | missense_variant      | COH/UCD        |
| SOX9  | G83fs*169          | Likely Oncogenic    | frameshift_variant    | COH/UCD        |
| SOX9  | Y84D               | Unknown             | missense_variant      | MSKCC          |
| SOX9  | K106*              | Likely Oncogenic    | stop_gained           | MSKCC          |
| SOX9  | F112fs*36          | Likely Oncogenic    | frameshift_variant    | COH/UCD        |
| SOX9  | M113T              | Unknown             | missense_variant      | MSKCC          |
| SOX9  | A118T              | Unknown             | missense_variant      | COH/UCD; MSKCC |
| SOX9  | A118_A124del       | Unknown             | inframe_deletion      | MSKCC          |
| SOX9  | X138_splice        | Likely Oncogenic    | splice_region_variant | MSKCC          |
| SOX9  | K141E              | Unknown             | missense_variant      | MSKCC          |
| SOX9  | L142R              | Likely Oncogenic    | missense_variant      | MSKCC          |
| SOX9  | W143*              | Likely Oncogenic    | stop_gained           | MSKCC          |
| SOX9  | W143Lfs*109        | Likely Oncogenic    | frameshift_variant    | MSKCC          |
| SOX9  | R144fs             | Likely Oncogenic    | frameshift_variant    | MSKCC          |
| SOX9  | E159Gfs*25         | Likely Oncogenic    | frameshift_variant    | MSKCC          |
| SOX9  | K167del            | Predicted Oncogenic | inframe_deletion      | COH/UCD        |

Supplementary Table S1

|      |              |                  |                    |                |
|------|--------------|------------------|--------------------|----------------|
| SOX9 | D168Efs*84   | Likely Oncogenic | frameshift_variant | MSKCC          |
| SOX9 | D171fs*81    | Likely Oncogenic | frameshift_variant | COH/UCD        |
| SOX9 | P176R        | Unknown          | missense_variant   | COH/UCD        |
| SOX9 | Q186R        | Unknown          | missense_variant   | COH/UCD        |
| SOX9 | E190*        | Likely Oncogenic | stop_gained        | MSKCC          |
| SOX9 | E191Rfs*28   | Likely Oncogenic | frameshift_variant | MSKCC          |
| SOX9 | N201fs*51    | Likely Oncogenic | frameshift_variant | COH/UCD        |
| SOX9 | Q208*        | Likely Oncogenic | stop_gained        | MSKCC          |
| SOX9 | S211fs*8     | Likely Oncogenic | frameshift_variant | COH/UCD        |
| SOX9 | S215Pfs*4    | Likely Oncogenic | frameshift_variant | MSKCC          |
| SOX9 | S228*        | Likely Oncogenic | stop_gained        | MSKCC          |
| SOX9 | Q230Nfs*23   | Likely Oncogenic | frameshift_variant | MSKCC          |
| SOX9 | G233Afs*20   | Likely Oncogenic | frameshift_variant | MSKCC          |
| SOX9 | V245Gfs*9    | Likely Oncogenic | frameshift_variant | MSKCC          |
| SOX9 | V245Gfs*7    | Likely Oncogenic | frameshift_variant | MSKCC          |
| SOX9 | Q246*        | Likely Oncogenic | stop_gained        | COH/UCD        |
| SOX9 | K253Efs*43   | Likely Oncogenic | frameshift_variant | MSKCC          |
| SOX9 | E255Gfs*34   | Likely Oncogenic | frameshift_variant | MSKCC          |
| SOX9 | R257Afs*23   | Likely Oncogenic | frameshift_variant | MSKCC          |
| SOX9 | L259*        | Likely Oncogenic | stop_gained        | MSKCC          |
| SOX9 | E261*        | Likely Oncogenic | stop_gained        | MSKCC          |
| SOX9 | G263fs*16    | Likely Oncogenic | frameshift_variant | COH/UCD        |
| SOX9 | G263Afs*16   | Likely Oncogenic | frameshift_variant | MSKCC          |
| SOX9 | P267fs*12    | Likely Oncogenic | frameshift_variant | COH/UCD        |
| SOX9 | P267Sfs*9    | Likely Oncogenic | frameshift_variant | MSKCC          |
| SOX9 | I268fs*28    | Likely Oncogenic | frameshift_variant | COH/UCD        |
| SOX9 | F270fs*7     | Likely Oncogenic | frameshift_variant | COH/UCD        |
| SOX9 | V273Gfs*7    | Likely Oncogenic | frameshift_variant | MSKCC          |
| SOX9 | I275Mfs*4    | Likely Oncogenic | frameshift_variant | MSKCC          |
| SOX9 | E277D        | Unknown          | missense_variant   | MSKCC          |
| SOX9 | L278Pfs*2    | Likely Oncogenic | frameshift_variant | MSKCC          |
| SOX9 | S279Afs*104  | Likely Oncogenic | frameshift_variant | MSKCC          |
| SOX9 | D281Gfs*15   | Likely Oncogenic | frameshift_variant | MSKCC          |
| SOX9 | D290Mfs*93   | Likely Oncogenic | frameshift_variant | MSKCC          |
| SOX9 | D295G        | Unknown          | missense_variant   | COH/UCD        |
| SOX9 | Q296*        | Likely Oncogenic | stop_gained        | MSKCC          |
| SOX9 | Y297*        | Likely Oncogenic | stop_gained        | MSKCC          |
| SOX9 | L298Pfs*86   | Likely Oncogenic | frameshift_variant | MSKCC          |
| SOX9 | H303fs*273   | Likely Oncogenic | frameshift_variant | COH/UCD        |
| SOX9 | V306fs*77    | Likely Oncogenic | frameshift_variant | COH/UCD        |
| SOX9 | P307fs*271   | Likely Oncogenic | frameshift_variant | COH/UCD        |
| SOX9 | Q312*        | Likely Oncogenic | stop_gained        | MSKCC          |
| SOX9 | Y319*        | Likely Oncogenic | stop_gained        | COH/UCD        |
| SOX9 | I321fs*64    | Likely Oncogenic | frameshift_variant | COH/UCD        |
| SOX9 | H333fs*179+  | Likely Oncogenic | frameshift_variant | COH/UCD        |
| SOX9 | W335*        | Likely Oncogenic | stop_gained        | MSKCC          |
| SOX9 | S337Pfs*46   | Likely Oncogenic | frameshift_variant | MSKCC          |
| SOX9 | Q339*        | Likely Oncogenic | stop_gained        | MSKCC          |
| SOX9 | Q340*        | Likely Oncogenic | stop_gained        | MSKCC          |
| SOX9 | P346fs*37    | Likely Oncogenic | frameshift_variant | COH/UCD        |
| SOX9 | Q348Hfs*35   | Likely Oncogenic | frameshift_variant | MSKCC          |
| SOX9 | P354_P356del | Unknown          | inframe_deletion   | COH/UCD        |
| SOX9 | P374fs*9     | Likely Oncogenic | frameshift_variant | COH/UCD        |
| SOX9 | P374Rfs*9    | Likely Oncogenic | frameshift_variant | MSKCC          |
| SOX9 | Q375Rfs*9    | Likely Oncogenic | frameshift_variant | MSKCC          |
| SOX9 | Q376Rfs*4    | Likely Oncogenic | frameshift_variant | MSKCC          |
| SOX9 | L382Gfs*2    | Likely Oncogenic | frameshift_variant | MSKCC          |
| SOX9 | T384Sfs*2    | Likely Oncogenic | frameshift_variant | MSKCC          |
| SOX9 | E388*        | Likely Oncogenic | stop_gained        | MSKCC          |
| SOX9 | Q393*        | Likely Oncogenic | stop_gained        | MSKCC          |
| SOX9 | Q393Sfs*10   | Likely Oncogenic | frameshift_variant | MSKCC          |
| SOX9 | H396Gfs*8    | Likely Oncogenic | frameshift_variant | MSKCC          |
| SOX9 | H396L        | Unknown          | missense_variant   | MSKCC          |
| SOX9 | I397fs*7     | Likely Oncogenic | frameshift_variant | COH/UCD        |
| SOX9 | E400fs*4     | Likely Oncogenic | frameshift_variant | COH/UCD        |
| SOX9 | E400*        | Likely Oncogenic | stop_gained        | MSKCC          |
| SOX9 | S403Efs*175  | Likely Oncogenic | frameshift_variant | MSKCC          |
| SOX9 | P404Sfs*59   | Likely Oncogenic | frameshift_variant | MSKCC          |
| SOX9 | H406Sfs*58   | Likely Oncogenic | frameshift_variant | MSKCC          |
| SOX9 | Y407*        | Likely Oncogenic | stop_gained        | COH/UCD        |
| SOX9 | Q410*        | Likely Oncogenic | stop_gained        | MSKCC          |
| SOX9 | Q412*        | Likely Oncogenic | stop_gained        | COH/UCD; MSKCC |
| SOX9 | H413Lfs*57   | Likely Oncogenic | frameshift_variant | MSKCC          |
| SOX9 | I418Mfs*52   | Likely Oncogenic | frameshift_variant | MSKCC          |
| SOX9 | S421fs*49    | Likely Oncogenic | frameshift_variant | COH/UCD        |
| SOX9 | S421Kfs*157  | Likely Oncogenic | frameshift_variant | MSKCC          |
| SOX9 | N424fs*47    | Likely Oncogenic | frameshift_variant | COH/UCD        |
| SOX9 | S438*        | Likely Oncogenic | stop_gained        | COH/UCD        |
| SOX9 | Q439fs*32    | Likely Oncogenic | frameshift_variant | COH/UCD        |

Supplementary Table S1

|      |                 |                  |                    |                |
|------|-----------------|------------------|--------------------|----------------|
| SOX9 | Y451*           | Likely Oncogenic | stop_gained        | MSKCC          |
| SOX9 | Y451Lfs*128     | Likely Oncogenic | frameshift_variant | MSKCC          |
| SOX9 | Y452fs*127      | Likely Oncogenic | frameshift_variant | COH/UCD        |
| SOX9 | Y463fs*8        | Likely Oncogenic | frameshift_variant | COH/UCD        |
| SOX9 | M469lfs*109     | Likely Oncogenic | frameshift_variant | MSKCC          |
| SOX9 | A472Vfs*51      | Likely Oncogenic | frameshift_variant | MSKCC          |
| SOX9 | Y477Lfs*101     | Likely Oncogenic | frameshift_variant | MSKCC          |
| SOX9 | T478fs*33+      | Likely Oncogenic | frameshift_variant | COH/UCD        |
| SOX9 | V486fs*26+      | Likely Oncogenic | frameshift_variant | COH/UCD        |
| SOX9 | V486Gfs*92      | Likely Oncogenic | frameshift_variant | MSKCC          |
| SOX9 | H493Pfs*85      | Likely Oncogenic | frameshift_variant | MSKCC          |
| SOX9 | Q500Hfs*74      | Likely Oncogenic | frameshift_variant | MSKCC          |
| SOX9 | *510fs*         | Likely Oncogenic | frameshift_variant | MSKCC          |
| SOX9 | HOMDEL          | Oncogenic        | gene_loss          | COH/UCD; MSKCC |
| SOX9 | AMP             | Unknown          | amplification      | COH/UCD; MSKCC |
| SOX9 | SOX9-intragenic | Oncogenic        | rearrangement      | MSKCC          |

Supplementary Table S2. APC mutation distribution in different age groups

| APC vs. Age | COH/UCD        |       |                |       | MSKCC    |                |       |                |       |         |
|-------------|----------------|-------|----------------|-------|----------|----------------|-------|----------------|-------|---------|
|             | < 40 years old |       | > 50 years old |       | p-value  | < 40 years old |       | > 50 years old |       | p-value |
|             | n=27           |       | n=228          |       |          | n=109          |       | n=550          |       |         |
| APC-WT      | 16             | 59.3% | 58             | 25.4% | 0.000563 | 33             | 30.3% | 121            | 22.0% | 0.064   |
| APC-MT      | 11             | 40.7% | 170            | 74.6% |          | 76             | 69.7% | 429            | 78.0% |         |

Supplementary Table S3. Alterations in genes in APC-WT patients with BRAF<sup>V600E</sup> vs. non-BRAF<sup>V600E</sup>

| Characteristics | COH/UCD             |    |                                 |    |                                     | MSKCC |         |                      |     |                                 |    |                                      |     |         |          |
|-----------------|---------------------|----|---------------------------------|----|-------------------------------------|-------|---------|----------------------|-----|---------------------------------|----|--------------------------------------|-----|---------|----------|
|                 | Total (%)<br>(N=86) |    | BRAF <sup>V600E</sup><br>(N=20) |    | Non-BRAF <sup>V600E</sup><br>(N=66) |       | p-value | Total (%)<br>(N=216) |     | BRAF <sup>V600E</sup><br>(N=31) |    | Non-BRAF <sup>V600E</sup><br>(N=185) |     | p-value |          |
| KRAS            | Mutated             | 30 | 34.9%                           | 0  | 0.0%                                | 30    | 45.5%   | 7.80E-05             | 92  | 42.6%                           | 0  | 0.0%                                 | 92  | 49.7%   | 8.92E-09 |
|                 | Non-mutated         | 56 | 65.1%                           | 20 | 100.0%                              | 36    | 54.5%   |                      | 124 | 57.4%                           | 31 | 100.0%                               | 93  | 50.3%   |          |
| NRAS            | Mutated             | 3  | 3.5%                            | 0  | 0.0%                                | 3     | 4.5%    | 1                    | 1   | 0.5%                            | 0  | 0.0%                                 | 1   | 0.5%    | 1        |
|                 | Non-mutated         | 83 | 96.5%                           | 20 | 100.0%                              | 63    | 95.5%   |                      | 215 | 99.5%                           | 31 | 100.0%                               | 184 | 99.5%   |          |
| TP53            | Mutated             | 69 | 80.2%                           | 17 | 85.0%                               | 52    | 78.8%   | 0.75                 | 169 | 78.2%                           | 27 | 87.1%                                | 142 | 76.8%   | 0.24     |
|                 | Non-mutated         | 17 | 19.8%                           | 3  | 15.0%                               | 14    | 21.2%   |                      | 47  | 21.8%                           | 4  | 12.9%                                | 43  | 23.2%   |          |
| ARID1A          | Mutated             | 3  | 3.5%                            | 0  | 0.0%                                | 3     | 4.5%    | 1                    | 3   | 1.4%                            | 0  | 0.0%                                 | 3   | 1.6%    | 1        |
|                 | Non-mutated         | 83 | 96.5%                           | 20 | 100.0%                              | 63    | 95.5%   |                      | 213 | 98.6%                           | 31 | 100.0%                               | 182 | 98.4%   |          |
| CTNNB1          | Mutated             | 4  | 4.7%                            | 0  | 0.0%                                | 4     | 6.1%    | 0.57                 | 8   | 3.7%                            | 1  | 3.2%                                 | 7   | 3.8%    | 1        |
|                 | Non-mutated         | 82 | 95.3%                           | 20 | 100.0%                              | 62    | 93.9%   |                      | 208 | 96.3%                           | 30 | 96.8%                                | 178 | 96.2%   |          |
| FBXW7           | Mutated             | 7  | 8.1%                            | 0  | 0.0%                                | 7     | 10.6%   | 0.19                 | 7   | 3.2%                            | 1  | 3.2%                                 | 6   | 3.2%    | 1        |
|                 | Non-mutated         | 79 | 91.9%                           | 20 | 100.0%                              | 59    | 89.4%   |                      | 209 | 96.8%                           | 30 | 96.8%                                | 179 | 96.8%   |          |
| RNF43           | Mutated             | 6  | 7.0%                            | 4  | 20.0%                               | 2     | 3.0%    | 0.02                 | 21  | 9.7%                            | 10 | 32.3%                                | 11  | 5.9%    | 1.07E-04 |
|                 | Non-mutated         | 80 | 93.0%                           | 16 | 80.0%                               | 64    | 97.0%   |                      | 195 | 90.3%                           | 21 | 67.7%                                | 174 | 94.1%   |          |
| SOX9            | Mutated             | 2  | 2.3%                            | 0  | 0.0%                                | 2     | 3.0%    | 1                    | 10  | 4.6%                            | 1  | 3.2%                                 | 9   | 4.9%    | 1        |
|                 | Non-mutated         | 84 | 97.7%                           | 20 | 100.0%                              | 64    | 97.0%   |                      | 206 | 95.4%                           | 30 | 96.8%                                | 176 | 95.1%   |          |
